1 **Inhibitors of ROCK kinases induce multiple mitotic defects and synthetic lethality in**  
2 **BRCA2-deficient cells**

3 Julieta Martino<sup>1\*</sup>, Sebastián O. Siri<sup>1\*</sup>, Natalia S. Paviolo<sup>1</sup>, Cintia Garro<sup>2,3</sup>, María F. Pansa<sup>2,§</sup>, Sofía  
4 Carbajosa<sup>2</sup>, Aaron C. Brown<sup>4</sup>, José L. Bocco<sup>2</sup>, Israel Gloger<sup>6</sup>, Gerard Drewes<sup>6</sup>, Kevin P.  
5 Madauss<sup>5</sup>, Gastón Soria<sup>2,3,#</sup> Vanesa Gottifredi<sup>1,#</sup>

6 1) Fundación Instituto Leloir-CONICET, Buenos Aires, Argentina.

7 2) Centro de Investigaciones en Bioquímica Clínica e Inmunología, CIBICI-CONICET,  
8 Departamento de Bioquímica Clínica, Facultad de Ciencias Químicas, Universidad Nacional de  
9 Córdoba, Córdoba, Argentina.

10 3) OncoPrecision, Córdoba, Argentina.

11 4) Center for Molecular Medicine, Maine Medical Center Research Institute, Scarborough, ME,  
12 United States.

13 5) GlaxoSmithKline-Trust in Science, Global Health R&D, Upper Providence, PA, United States.

14 6) GlaxoSmithKline-Trust in Science, Global Health R&D, Stevenage, United Kingdom.

15 \* equal contribution

16 #Corresponding authors

17 § Present address:

18 Maria F Pansa: GlaxoSmithKline-Trust in Science, Global Health R&D, Upper Providence, PA,  
19 United States.

20

21 **Abstract**

22 BRCA2-deficient cells are highly sensitive to poly-ADP-ribose polymerase inhibitors (PARPi)  
23 due to their impaired homologous recombination repair. This increased cytotoxicity is triggered  
24 by DNA replication stress induced by PARP trapping on DNA. Thus, it is broadly assumed that  
25 DNA damage is a prerequisite for BRCA2 synthetic lethality (SL). Here we show that inhibiting  
26 ROCK kinases in BRCA2 deficient cells, triggers SL independently from acute replication stress.  
27 In contrast, such SL is preceded by enhanced M-phase defects such as anaphase bridges, and  
28 abnormal mitotic figures, which were associated with multipolar spindles, supernumerary  
29 centrosomes and multinucleation. SL was also triggered by inhibiting Citron Rho-interacting  
30 kinase, another enzyme which, similarly to ROCK kinases, regulates cytokinesis. Together,  
31 these observations suggest cytokinesis failure as trigger of mitotic abnormalities and SL in  
32 BRCA2 cells. Furthermore, preventing mitotic entry by Early mitotic inhibitor 1 (EMI1) depletion  
33 promoted survival of BRCA2 deficient cells treated with inhibitors of ROCK kinases, thus  
34 reinforcing the association between M-phase and the cell death in BRCA2 deficient cells. This  
35 novel mechanism of SL induction is in contrast to the one triggered by PARPi and uncovers  
36 mitosis as an Achilles heel of BRCA2 deficient cells.

37

## 38 **Introduction**

39

40 Hereditary breast and ovarian cancer (HBOC) is an autosomal dominant disease that accounts  
41 for 5-10% of breast (Krainer et al., 1997; Langston, Malone, Thompson, Daling, & Ostrander,  
42 1996) and 15% of ovarian cancer cases (Pal et al., 2005; Zhang et al., 2011). HBOC is primarily  
43 caused by mutations in the breast cancer susceptibility genes BRCA1 and BRCA2 (Futreal et  
44 al., 1994; Miki et al., 1994; Wooster et al., 1995). BRCA1 and BRCA2 are DNA repair genes  
45 and their protein products regulate homologous recombination (HR), a repair pathway that is  
46 recruited to highly toxic DNA double-strand breaks (DSBs) (Prakash, Zhang, Feng, & Jasin,  
47 2015). BRCA1 and BRCA2-deficient cells exhibit structural chromosome abnormalities and are  
48 highly sensitive to DNA damaging agents (Moynahan, Cui, & Jasin, 2001; Patel et al., 1998; Yu  
49 et al., 2000). Additionally, BRCA-deficient cells exhibit translocations, large deletions and  
50 chromosome fusions (Moynahan et al., 2001; Yu et al., 2000). This chromosome instability  
51 underlies the tumorigenicity of BRCA-deficient tumors and underscores the important tumor  
52 suppressor function of BRCA genes in cells.

53 Mutations in BRCA genes are highly penetrant and their carriers have high risk of developing  
54 early onset breast and ovarian cancer (Antoniou et al., 2003; King, Marks, & Mandell, 2003).  
55 Carriers of BRCA mutations are also at an increased risk of developing other tumor types such  
56 as pancreas, prostate and melanoma (Cavanagh & Rogers, 2015; Gumaste et al., 2015).  
57 BRCA-deficient patients whose mutations are detected before cancer onset are suggested to  
58 undergo highly invasive surgeries such as salpingo-oophorectomy and mastectomy. The  
59 standard of care for BRCA patients with tumors is similar to the approach used for patients with  
60 sporadic tumors, with the exception of some types of BRCA tumors which might be more  
61 sensitive to platinum-based therapies (Vencken et al., 2011; Yang et al., 2011). Unfortunately,  
62 chemotherapy resistance to platinum agents is common and alternative therapies are most  
63 needed for these patients.

64 One alternative therapy, already available clinically, are poly-ADP-ribose polymerase (PARP)  
65 inhibitors which are highly effective in killing BRCA-deficient cells (Bryant et al., 2005; Farmer et  
66 al., 2005; McCabe et al., 2006) and several PARP inhibitors (PARPi) have been approved for  
67 clinical use. The synthetic lethality (SL) observed between BRCA deficiency and PARPi is due  
68 to the ability of PARPi to physically trap PARP on the DNA (Murai et al., 2014; Murai et al.,  
69 2012). PARP trapping triggers DNA replication stalling and collapse, which require HR-mediated  
70 repair, a mechanism that is facilitated by BRCA1 and BRCA2 and which is therefore impaired in  
71 BRCA1 and BRCA2-deficient cells (Prakash et al., 2015). As with every cancer therapy,

72 resistance to PARPi is also observed in the clinic (Barber et al., 2013). Molecular mechanisms  
73 of resistance to PARPi include but are not limited to secondary mutations that restore HR  
74 function, increased drug efflux, and decreased PARP trapping (D'Andrea, 2018; Noordermeer &  
75 van Attikum, 2019).

76 Although BRCA proteins were originally described for their key roles within HR, we currently  
77 know that BRCA1 and BRCA2 have pleiotropic functions, performing other functions outside  
78 canonical HR (Lee, 2014; Venkitaraman, 2014). Thus, it is likely that multiple targets not  
79 restricted to HR could be exploited for SL therapeutic approaches. This concept has been  
80 corroborated for BRCA1 in a phenotypic screening in which we tested BRCA-deficient cells for  
81 SL against the kinase inhibitor library PKIS2 (Carbajosa et al., 2019). Our findings unveiled that  
82 BRCA1 cells are highly sensitive to inhibition of Polo-like kinase 1 (PLK1) and that this  
83 sensitivity does not require excess DNA damage caused by external agents.

84 In this study, we present findings indicating that BRCA2-deficient cells are highly sensitive to the  
85 inhibition or depletion of ROCK kinases (ROCK), which regulate actin cytoskeleton dynamics.  
86 Unlike PARPi, ROCK inhibitors (ROCKi) did not induce acute replication stress in BRCA2-  
87 deficient cells but instead triggered mitosis defects including cytokinesis failure, polyploidy,  
88 aberrant multipolar spindles and centrosome amplification. Remarkably, SL-induction was also  
89 observed after inhibition of Citron Rho-interacting kinase (CITK), an enzyme that regulates  
90 cytokinesis at the level of mitotic furrow cleavage, indicating that cytokinesis failure is likely the  
91 trigger of this novel SL interaction. Moreover, preventing mitotic entry via depletion of Early  
92 mitotic inhibitor 1 (EMI1), abrogated ROCKi-induced cell killing. In conclusion, while the  
93 accumulation of DNA damage in S phase is required for PARPi-mediated cell death (Chaudhuri  
94 et al., 2016; Schoonen et al., 2017), our findings highlight that BRCA2-deficient cells bear  
95 additional vulnerabilities outside S phase that could represent promising new SL targets.

96

97 **Results**

98

99 *BRCA2-deficient cells are sensitive to ROCK inhibition*

100

101 In a previous work (Carbajosa et al., 2019) we developed a phenotypic survival screening  
102 method to evaluate the differential sensitivity of BRCA1-deficient cells against 680 ATP-  
103 competitive kinase inhibitors provided by GlaxoSmithKline (Drewry et al., 2017; Elkins et al.,  
104 2016). Briefly, the screening was performed using HCT116<sup>p21-/-</sup> cell lines in which BRCA1 or  
105 BRCA2 were stably downregulated using shRNA (Figure 1A). This allowed comparison of  
106 BRCA-proficient vs. BRCA-deficient cell lines on an isogenic background that is easy to grow  
107 and tolerates seeding at densities that allow long term (i.e.: 6 days) survival analysis.  
108 Additionally, we used a p21 knockout background, which attenuates the cell cycle arrest that  
109 otherwise would mask the cytotoxic phenotypes during the screening time frame.

110 In this work, we analyzed the screening results of the BRCA2-deficient cell population. BRCA2  
111 depletion by shRNA in HCT116<sup>p21-/-</sup> cells was sufficient to trigger increased sensitivity to  
112 Olaparib (Figure 1B-C). For the analysis, we focused on compounds that induced SL exclusively  
113 in the BRCA2-deficient population and were not toxic to control samples or BRCA1-deficient  
114 cells (Figure 1D). Interestingly, BRCA2 deficient cells showed remarkable sensitivity to three  
115 inhibitors of ROCK kinases (ROCK) (Figure 1E and Figure 1- figure supplement 1A). The  
116 selective activity of each compound was further validated in a dose-response curve (Figure 1F).

117 To test the sensitivity of BRCA2-depleted cells to ROCK inhibition, we took advantage of two  
118 commercially available ROCK inhibitors (ROCKi), Fasudil and Ripasudil, which are approved for  
119 diseases other than cancer (Garnock-Jones, 2014; Shi & Wei, 2013). Both are ATP-competitive  
120 inhibitors targeting ROCK1 and ROCK2 (Nakagawa et al., 1996). We performed survival assays  
121 with Fasudil in several cellular models of BRCA2 deficiency including the HCT116<sup>p21-/-</sup> cell line  
122 used in the screening (Figure 2A). We also tested survival in DLD-1/DLD-1<sup>BRCA2-/-</sup> paired cell  
123 lines, which are BRCA2 knockout (Figure 2B) and the PEO4/PEO1, V-C8 #13/V-C8 paired cell  
124 lines (see description of cell lines in the methods section - Figure 2C-D). SL was observed in all  
125 BRCA2-deficient cell line models following Fasudil treatment (Figure 2A-D). Cell death was  
126 confirmed using SYTOX green, a dye that only enters cells when cellular membranes have  
127 been compromised (Figure 2E). Similar differences between control and BRCA2-deficient  
128 counterparts were observed with Ripasudil, another ROCKi (Figure 1- figure supplement 1B-C).  
129 In contrast, the BRCA1-deficient cell line HCC1937 (Tomlinson et al., 1998), which is sensitive  
130 to Olaparib (Figure 1- figure supplement 1D), did not exhibit increased sensitivity to Fasudil or

131 Ripasudil compared to the complemented HCC1937<sup>BRCA1</sup> cell line (Treszezamsky et al., 2007)  
132 (Figure 1- figure supplement 1E-F). Similar results were observed using HCT116 cellular  
133 models depleted from BRCA1 (Figure 1- figure supplement 1G-I). The unique sensitivity of  
134 BRCA2-deficient cells to ROCKi suggests that the SL observed is likely independent of the  
135 homologous recombination function of BRCA2.

136 Importantly, we observe strong SL by ROCKi in growing conditions that triggered only mild  
137 sensitivity to PARPi. While HCT116<sup>p21<sup>-/-</sup></sup> shBRCA2, V-C8 and DLD-1<sup>BRCA2<sup>-/-</sup></sup> were all sensitive to  
138 Olaparib (Figure 2- figure supplement 1A), PEO1 showed only modest sensitivity to Olaparib in  
139 our experimental conditions (Figure 2- figure supplement 1B), despite reports indicating that  
140 they should depict sensitivity to PARPi (Sakai et al., 2009; Stukova et al., 2015; Whicker, Lin,  
141 Hanna, Sartorelli, & Ratner, 2016). We confirmed that PEO1 did not express BRCA2. The  
142 BRCA2 mutation in PEO1 (5193C>G) creates a premature stop codon and also a digestion site  
143 for the enzyme DrdI. In contrast, the reversion mutation in PEO4 (5193C>T) abolishes this site  
144 (Figure 2- figure supplement 1C). Consistent with their expected point mutation, following DrdI  
145 digestion PEO1 cells showed two DNA fragments (480 bp and 214 bp), which were not  
146 observed in PEO4 cell lines (Figure 2- figure supplement 1D). Additionally, as previously  
147 reported for BRCA2 deficient cell lines, (Sakai et al., 2009; Stronach et al., 2011; Stukova et al.,  
148 2015; Whicker et al., 2016) PEO1 cells are sensitive to cisplatin (Figure 2- figure supplement  
149 1E). Our results suggest that while clonogenic assays and other approaches may better expose  
150 the sensitivity of PEO1 to Olaparib, strong SL induced by ROCKi is observed in growing  
151 conditions that reveal only mild sensitivity to PARPi. Hence, synthetic lethal avenues that  
152 diverge from PARPi could provide efficient therapeutic alternatives for the treatment of BRCA2-  
153 deficient cancer cells.

154

155 *Acute replication stress is not the major driver of SL between BRCA2-deficiency and ROCK*  
156 *inhibition*

157

158 The SL observed between BRCA deficiency and PARPi takes place downstream of the  
159 accumulation of acute replication stress caused by PARP trapping on the DNA (Murai et al.,  
160 2012; Schoonen et al., 2017). As BRCA-deficient cells keep progressing across S-phase in the  
161 presence of PARPi, PARP/DNA adducts exacerbate replication stress resulting from fork  
162 stalling, gap formation and fork collapse (Kolinjivadi et al., 2017; Lemaçon et al., 2017; Mijic et  
163 al., 2017; Panzarino et al., 2021; Schlacher et al., 2011; Taglialatela et al., 2017). Consistent  
164 with those reports, the treatment of HCT116<sup>p21<sup>-/-</sup></sup> shBRCA2 cells with Olaparib caused the

165 accumulation of replication stress markers such as 53BP1 and  $\gamma$ -H2A.X nuclear foci, which  
166 represent sites of DSB formation in S phase (Figure 3A-B). In strike contrast to Olaparib, no  
167 increase in 53BP1 or  $\gamma$ -H2A.X foci was induced by Fasudil treatment in HCT116<sup>p21<sup>-/-</sup></sup> shBRCA2  
168 cells (Figures 3A-B). These results were also validated in PEO cells (Figure 3C). In line with the  
169 lack of replication stress, we did not observe a difference in the percent of BrdU+ cells after 3 or  
170 6 days of Fasudil treatment (Figure 3D). Additionally, the intensity of BrdU was also unaffected  
171 (Figure 3 - figure supplement 1). These findings point toward a cell death-mechanism that is not  
172 centered on the accumulation of DNA damage in S-phase.

173

#### 174 *ROCK inhibition induces mitotic defects in BRCA2-deficient cells*

175

176 To explore potential mechanisms of cell death unrelated to replication stress, we analyzed the  
177 cell cycle profiles with propidium iodide staining. Consistent with reduced survival at 6 days  
178 (Figure 2), in BRCA2-deficient cells we observed a sub-G1 peak after Fasudil treatment  
179 indicative of apoptotic cell death (Figure 4A-B). In terms of cell cycle distribution, BRCA2 cells  
180 treated with Fasudil exhibited an accumulation of cells in G2/M indicative of a G2/M arrest  
181 (Figure 4A-B). Intriguingly, BRCA2 cells also exhibited a peak of >4N polyploid cells (Figure 4A-  
182 B). By performing a detailed time course, in which samples were collected in 24-hour intervals,  
183 we observed that the polyploidy phenotype was cumulative. (Figure 4C). While the G2/M arrest  
184 in BRCA2-deficient cells appeared as early as 24 hours post-treatment, polyploidy became  
185 strongly evident at 72 hours (i.e.: 3 days). The sub-G1 population was also evident as early as  
186 24 hours but an increase of cell death was observed at longer time points after polyploidy  
187 detection (i.e.: after 3 days). These data suggest that the accumulation of cells in G2/M  
188 precedes both polyploidy and cell death.

189 The concomitant accumulation of cells in G2/M and the extra DNA content is highly suggestive  
190 of problems in the correct finalization of M phase which leads to accumulation of aberrant  
191 mitotic phenotypes. When quantifying aberrant metaphases in which the DNA was being pulled  
192 in multiple directions or in which the chromosomes were not aligned in the metaphase plate  
193 (Figure 4D) we observed a substantial increase of such phenotypes after Fasudil treatment in  
194 BRCA2-deficient cells (Figure 4E). Altogether, these data pinpoint to mitosis being dysregulated  
195 in BRCA2-deficient cells in which ROCK activity is prevented.

196 Aberrant metaphases can be triggered by unresolved DNA replication defects accumulated after  
197 DNA replication stress (Gelot, Magdalou, & Lopez, 2015), but can also be triggered within M  
198 phase as a consequence of aberrant mitotic spindle organization or disorganized chromosome

199 alignment (Bakhoun, Thompson, Manning, & Compton, 2009; Shindo, Otsuki, Uchida, & Hirota,  
200 2021; Siri, Martino, & Gottifredi, 2021). Aberrant anaphases (bridges and lagging chromosomes;  
201 Figure 5A) can also be triggered either by replication defects that are not resolved before M  
202 phase entry or intrinsic mitotic defects dissociated from S phase (Bakhoun et al., 2009; Shindo  
203 et al., 2021). We documented an increase in chromosome bridges, but not in lagging  
204 chromosomes, after Fasudil treatment of BRCA2-deficient cells (Figure 5B-C). To validate the  
205 increment of chromosome bridges observed with Fasudil, we used commercially available  
206 siRNAs against ROCK1 and ROCK2 (Figure 5D). Similar to ROCKi, ROCK1 and ROCK2  
207 (ROCK1/2) depletion promoted the accumulation of anaphase bridges in BRCA2-deficient cells  
208 (Figure 5E). Importantly, when resulting from unresolved replication defects, anaphase  
209 aberrations are normally accompanied by chromosome aberrations (i.e.: breaks, exchanges)  
210 and micronuclei (Finardi, Massari, & Visintin, 2020; Utani, Kohno, Okamoto, & Shimizu,  
211 2010). However, we did not find any indication of chromosome aberrations or micronuclei in  
212 Fasudil treated BRCA2-deficient cells (Figure 3 - figure supplement 2A-B). which suggested that  
213 the trigger for anaphase bridge formation following Fasudil treatment is a defect intrinsic to M  
214 phase.

215

#### 216 *ROCK inhibition causes cytokinesis failure in BRCA2-deficient cells*

217

218 Given that BRCA2-deficient cells treated with ROCKi accumulate M-phase defects, we explored  
219 the link between ROCK kinases and mitosis. ROCK kinases are key regulators of the actin  
220 cytoskeleton (Julian & Olson, 2014). ROCK kinases have been implicated in regulating the  
221 contraction of the actin cytoskeleton towards the end of mitosis and its downregulation or  
222 absence induces multinucleation due to cytokinesis failure (Daniels, Wang, Lee, &  
223 Venkitaraman, 2004; Jonsdottir et al., 2009; Mondal et al., 2012; Shive et al., 2010). On the  
224 other hand, BRCA2 localizes to the midbody during cytokinesis and its downregulation or  
225 absence was also reported to induce multinucleation (Lekomtsev, Guizetti, Pozniakovsky,  
226 Gerlich, & Petronczki, 2010). To explore potential roles in cytokinesis regulation between ROCK  
227 and BRCA2, we stained the actin cytoskeleton with Phalloidin to distinguish individual  
228 cytoplasm and analyzed the formation of binucleated as well as multinucleated cells after  
229 Fasudil treatment (Figure 6A). We observed a marked increase of binucleation in BRCA2-  
230 deficient cells following Fasudil treatment (Figure 6B-C). Also, we documented an increase of  
231 multinucleation in BRCA2-deficient cells transfected with siROCK (Figure 6 - figure supplement  
232 1A-B). Consistent with the polyploidy (>4N) observed with flow cytometry, Fasudil treatment



233 also increased the percent of multinucleated cells with 3, 4 or 5+ nuclei (Figure 6B-C). Similar to  
234 the poliploidy in the cell cycle profiles, the proportion of multinucleated cells was more severe at  
235 later endpoints (Figure 6B-C) suggesting that despite cytokinesis failure, binucleated cells  
236 continue to cycle, thus further increasing their DNA content. Indeed, the percentage of BRCA2-  
237 deficient binucleated cells transiting S phase, as revealed by cyclin A staining, was between 30-  
238 40% irrespective of ROCKi. This indicates that despite their diploid DNA content, BRCA2-  
239 deficient cells treated with Fasudil were able to start a new cell cycle and transit through a  
240 second S phase (Figure 6 - figure supplement 1C-D).

241 One immediate consequence of cytokinesis failure is that the resulting cell contains two  
242 centrosomes instead of one (Ganem, Storchova, & Pellman, 2007). Normal cells harbor one  
243 centrosome which duplicates only once during S phase. Duplicated centrosomes form a bipolar  
244 mitotic spindle during a normal mitosis ensuring equal chromosome distribution in daughter  
245 cells. (Nigg, 2007). In contrast, multiple centrosomes can lead to multipolar mitosis and cell  
246 death (Ganem, Godinho, & Pellman, 2009). We stained cells for gamma-tubulin and alpha-  
247 tubulin, central components of centrosomes and microtubules, respectively (Brinkley, 1997;  
248 Fuller et al., 1995) and focused on mitotic cells. BRCA2-deficient cells treated with Fasudil  
249 exhibited increased numbers of multipolar mitosis that correlated with increased centrosome  
250 number (i.e.: >2) (Figure 6D-F). Similar to previously observed phenotypes, such as aberrant  
251 metaphases, binucleated cells and polyploidy, the percent of multipolar mitosis increased at  
252 later endpoints (Figure 6F). Together, these results suggest that the cytokinesis failure and  
253 altered centrosome numbers, leads to multipolar mitosis which could be the trigger for cell death  
254 in Fasudil-treated BRCA2-deficient cells.

255

#### 256 *Cytokinesis failure sensitize BRCA2-deficient cells to cell killing*

257

258 If cytokinesis defects caused by ROCKi are the trigger of BRCA2-deficient SL, targeting other  
259 factors of cytokinesis should induce cell death as well. To test this hypothesis, we  
260 downregulated Citron Rho kinase (CITK), an enzyme that is highly enriched in the midbody  
261 during cytokinesis (Madaule et al., 1998; Sahin et al., 2019) (Figure 7A). CITK is required for  
262 proper RhoA localization at the cleavage site during late cytokinesis (Sahin et al., 2019). Similar  
263 to the phenotypes of siROCK1/2, CITK downregulation reduced cell survival of BRCA-2  
264 deficient cells (Figure 7B and Figure 7 - figure supplement 1A). In addition, and recapitulating  
265 the effect of ROCK inhibition or depletion, CITK downregulation increased the number of  
266 multinucleated cells in BRCA2-deficient cells (Figure 7C). Most remarkably, concomitant

267 silencing of CITK and ROCK1/2 was not additive/synergistic (Figure 7B), thus suggesting that  
268 ROCK and CITK depletion activate the same synthetic lethal mechanism in BRCA2-deficient  
269 cells. Together, these findings indicate that cytokinesis failure by multiple sources could induce  
270 death in BRCA2-deficient cells.

271 If aberrant transit through mitosis is the origin of the cell death triggered by ROCKi, then the  
272 bypass of mitosis should protect those cells from cell death. To this end, we downregulated  
273 Early mitotic inhibitor-1 (EMI1), an anaphase promoting complex (APC) inhibitor that has a key  
274 role in the accumulation of mitosis activators including B-type cyclins (Reimann et al., 2001).  
275 When transfecting siEMI1, we observed a 65% reduction in EMI1 expression (Figure 7D) and,  
276 as reported by others (Robu, Zhang, & Rhodes, 2012; Shimizu et al., 2013; Verschuren, Ban,  
277 Masek, Lehman, & Jackson, 2007), accumulation of cells with G2/M DNA content or higher  
278 (Figure 7E). EMI1 depletion prevented the SL effect of ROCKi on different BRCA2 deficient cells  
279 (Figure 7F and Figure 7 - figure supplement 1B). Therefore, these results indicate that aberrant  
280 mitotic cells are likely the trigger of cell death in BRCA2-deficient cells upon ROCK inhibition.

281

## 282 Discussion

283

### 284 *Targeting mitosis as an alternative SL strategy*

285

286 In this work we used a novel screening platform developed and validated by our group  
287 (Carbajosa et al., 2019; Garcia et al., 2020) to identify ROCK as novel targets for SL induction in  
288 BRCA2 cells. Using commercially available, and clinically relevant, ROCKi (i.e.: Fasudil and  
289 Ripasudil) (Shi & Wei, 2013), we observed a dose-dependent SL-induction in multiple BRCA2-  
290 deficient cell lines which showed no signs of acute DNA replication stress. In contrast, these  
291 cells exhibited strong mitotic defects as a result of the cytokinesis failure induced by ROCKi.  
292 Remarkably, cell death by ROCK inhibition or depletion was recapitulated by the inhibition of  
293 another enzyme that facilitates cytokinesis, CITK, hence suggesting that binucleation precedes  
294 multinucleation and SL (see model in Figure 7G). In fact, robust evidence in the literature  
295 indicates that highly abnormal metaphases/anaphases, such as the ones we observed, are  
296 incompatible with cell viability (Ganem et al., 2009) and are therefore the most plausible cause  
297 the SL induced by ROCKi in BRCA2-deficient cells. While still viable, multinucleated cells are  
298 highly vulnerable. The presence of extra DNA content and centrosomes, increase the chances  
299 of abnormal spindle polarity, as well as the number of chromosomes that need to be properly  
300 aligned. In fact, attempts to trigger cell division in such states is incompatible with viability  
301 (Ganem et al., 2009; Rein, Landsverk, Micci, Patzke, & Stokke, 2015; Schoonen et al., 2017).  
302 We therefore postulate that the cytokinesis failure of a cell with 4N or more DNA content is the  
303 major driver for BRCA2 cell death following ROCK inhibition. As such, targeting mitosis alone in  
304 the absence of increased replication stress may be sufficient to kill BRCA2 cells. Future  
305 research on the mitotic functions of BRCA will certainly provide valuable information on  
306 synthetic lethal alternatives for cancers whose hallmark is the loss of this tumor suppressor  
307 gene.

308

### 309 *BRCA2 deficient cells can be killed in a manner that is independent from the induction of acute* 310 *replication stress*

311

312 In addition to the well documented replication stress-mediated toxicity of PARPi in BRCA-  
313 deficient cells (Schlachter et al., 2011; Schoonen et al., 2017), a recent report indicates that  
314 BRCA2-deficient cells can also be killed by mild replication defects which do not cause  $\gamma$ H2A.X  
315 accumulation in S phase (Adam et al., 2021). This is dependent on the transmission of under-

316 replicated DNA from S to M phase triggered by BRCA 1 or BRCA2 deficiency and the lack of  
317 CIP2A-TOPBP1 complex formation in M phase. In the absence of the later complex, under-  
318 replicated DNA is aberrantly processed into acentric chromosomes and micronuclei which are  
319 the source of SL (Adam et al., 2021). Our present work reveals yet another weakness of  
320 BRCA2-deficient, but not BRCA1-deficient, cells: cytokinesis. Strikingly, such SL is not  
321 preceded by the accumulation of broken chromosomes or micronuclei and is independent from  
322 canonical players of the DDR, as it is observed after ROCK or CITK inhibition.

323 Intriguingly, while the triggers of SL by PARPi, CIP2A-TOPBP1 complex disruption and ROCKi  
324 are remarkably different, the three mechanisms converge at mitosis ((Adam et al., 2021;  
325 Schoonen et al., 2017; Schoonen & van Vugt, 2018) and this work). CDK1 inhibition blocked  
326 micronucleation which is the trigger for BRCA-deficient cell death by CIP2A-TOPBP1 complex  
327 disruption (Adam et al., 2021), while PARPi and ROCKi-mediated cell death was abrogated by  
328 EMI1-depletion ((Schoonen et al., 2017) and this work). Hence, the transit through M phase is  
329 required for all SL events triggered in BRCA2-deficient cells. Of note, the accumulation of viable  
330 multinucleated BRCA2-depleted cells capable of enabling DNA synthesis after ROCKi reveal  
331 that, at least for a few DNA replication cycles, a cytokinesis-free cell cycle progression promotes  
332 BRCA-2 cell survival after ROCKi. Interestingly, multinucleation was reported after PARPi  
333 treatment as well (Schoonen et al., 2017) and anaphase bridges were detected both after  
334 ROCKi and PARPi as a potential source of either multinucleation or cell death ((Schoonen et al.,  
335 2017) and this work). In conclusion, despite the strong difference in the initial trigger of cell  
336 death, both after PARPi and ROCKi, BRCA2-deficient cells die at the stage of mitosis.

337 It should also be mentioned that our experimental analysis does not rule out that background  
338 levels of replication stress or increased levels of under-replicated DNA induced by BRCA2  
339 deficiency could be promoting cell death by ROCK inhibition. As suggested by (Adam et al.,  
340 2021), it is possible that BRCA2-deficient cells rely more on M phase due to their defects in of  
341 the completion of DNA synthesis, making them more susceptible to suboptimal M phase (e.g.:  
342 triggered by ROCKi). However, if the source of SL was simply associated with DNA synthesis  
343 events, then it would also be likely present in BRCA1-deficient backgrounds, which we did not  
344 observe. Importantly, BRCA1 backgrounds are also vulnerable during M phase, as we  
345 previously observed SL between BRCA1 and PLK1 inhibitors (Carbajosa et al., 2019). This  
346 indicates that HR impairment is not the only possible trigger of SL in BRCA1 and BRCA2  
347 backgrounds that could be therapeutically exploited. In the future, M phase may provide a  
348 window of opportunity for novel treatments in patients that do not respond to PARPi therapy.

349

350 *Cytokinesis failure as the trigger of the SL between BRCA2-deficiency and ROCK inhibition*

351

352 We believe that DNA replication defects are not the main trigger for the SL observed with  
353 ROCKi, and that defects intrinsic to M phase are more likely account for ROCKi-induced cell  
354 death of BRCA2-deficient cells. Intriguingly, BRCA2 and ROCK functions converge at  
355 cytokinesis. ROCK kinases accumulate at the cleavage furrow (Kosako et al., 2000; Yokoyama,  
356 Goto, Izawa, Mizutani, & Inagaki, 2005), regulate furrow ingression, and their knockdown  
357 induces multinucleation (Yokoyama et al., 2005). Similarly, CITK localizes to the cleavage  
358 furrow and its downregulation or inhibition also causes multinucleation (Kosako et al., 2000;  
359 Sahin et al., 2019). Cytokinesis defects have also been reported for BRCA2-deficient cells  
360 (Daniels et al., 2004; Jonsdottir et al., 2009; Mondal et al., 2012; Rowley et al., 2011). However,  
361 BRCA2 localizes to a different cytokinesis structure than ROCK, the midbody (Daniels et al.,  
362 2004; Jonsdottir et al., 2009; Mondal et al., 2012; Rowley et al., 2011). Remarkably, previous  
363 reports suggest that the effect of BRCA2 downregulation on cytokinesis regulation may be very  
364 mild (Lekomtsev et al., 2010). Given ROCK and BRCA2 localize to cytokinesis structures that  
365 are also separated in time (furrow and midbody), the deficiency in both functions may potentiate  
366 cytokinesis failure and cell death. Supporting this, we observed not only SL but also a  
367 substantial increase in bi- or multinucleated cells when ROCK is inhibited on BRCA2-deficient  
368 backgrounds.

369 An alternative trigger to the SL is the formation of multipolar spindle which could be triggered by  
370 centrosome amplification. BRCA2 contributes to the regulation of centriole splitting (Saladino,  
371 Bourke, Conroy, & Morrison, 2009) and centrosome number (Ehlén et al., 2020; Saladino et al.,  
372 2009; Tutt et al., 1999). BRCA2 also localizes to centrosomes and preventing such a  
373 localization causes centrosome amplification and multinucleation (Shailani, Kaur, & Munshi,  
374 2018). ROCK also localizes to the centrosome (Chevrier et al., 2002; Ma et al., 2006) and its  
375 activity is required for centrosome movement and positioning (Chevrier et al., 2002; Rosenblatt,  
376 Cramer, Baum, & McGee, 2004). Similar to BRCA2 deficiency, ROCK inhibition also induces  
377 centriole splitting and centrosome amplification (Aoki, Ueda, Kataoka, & Satoh, 2009; Chevrier  
378 et al., 2002; Oku et al., 2014). Interestingly, both ROCK and BRCA2 bind nucleophosmin  
379 (NPM/B23), a protein involved in the timely initiation of centrosome duplication (Ma et al., 2006;  
380 Okuda et al., 2000) and disrupting the interaction between BRCA2 and NPM/B23 induces  
381 centrosome fragmentation and multinucleation (Wang, Takenaka, Nakanishi, & Miki, 2011).  
382 Hence, the SL observed after BRCA2-deficiency and ROCKi may also be triggered by  
383 centrosome defects and lead to mitotic spindle defects, cytokinesis failure and cell death.

384 Further work may shed additional light on this SL pathway and unravel other potential druggable  
385 targets that could be explored as therapeutic alternatives for the treatment of BRCA2-deficient  
386 tumors.

387

## 388 **Materials and methods**

389

### 390 *Screening*

391 Stable HCT116<sup>p21<sup>-/-</sup></sup> cell lines tagged with fluorescent proteins (CFP, iRFP or mCherry) and  
392 expressing Scramble, BRCA1, or BRCA2 shRNAs (Carbajosa et al., 2019) were co-cultured in  
393 equal proportions in 96-well plates for 6 days in the presence (0.1  $\mu$ M) of each of the 680  
394 compounds of the Protein Kinase Inhibitor Set 2 (PKIS2) library (Drewry et al., 2017; Elkins et  
395 al., 2016). At the end of treatment, the final cell number for each cell population was assessed  
396 with an automated flow cytometer (FACSaria II, BD Biosciences). Olaparib (#S1060,  
397 Selleckchem) at 100 nM was used as a positive control in each screening plate.

398 For each tested compound, two scenarios are possible: A) non selective effect, where the ratio  
399 of the populations remains unchanged. The non-selective compounds can either be non-toxic  
400 (the number of cells in all populations remains the same) or toxic (the number of cells from each  
401 population decreases similarly). B) synthetic lethal: there is selective toxicity against the BRCA2  
402 population, thus changing the relative abundance and ratio between the different populations.  
403 Additionally, a compound was considered a “hit” if it exhibited a >5 standard deviation on two  
404 values: 1) Fold of SL induction, calculated from the ratios of the different populations in each  
405 individual well; and 2) Survival difference, calculated from the differential survival when  
406 comparing a given treatment to the untreated wells in the same plate. For more extensive  
407 details on the screening platform and calculations used for the analysis please refer to  
408 Carbajosa et al. (2019).

409

### 410 *Lentiviral production*

411 Lentiviral shRNA vectors were generated by cloning shBRCA2 (sequence) or shScramble (5'-  
412 GTTAACTGCGTACCTTGAGTA) into the pLKO.1-TRC vector (Grotsky et al., 2013). HEK293T  
413 cells were transfected with pLKO.1 and packaging plasmids (psPAX, and pMD2.G) 24 hours  
414 post-seeding using JetPrime transfection reagent (Polyplus). After 24 hours, media was  
415 changed. Two days after, media was collected, centrifuged and supernatants were aliquoted  
416 and stored at -80°C. Optimal viral titers were tested by serial dilutions and selected based upon  
417 minimal toxicity observed in the target cells.

418

419 *Generation of HCT116<sup>p21-/-</sup> shRNA stable cell lines*

420 HCT116<sup>p21-/-</sup> cells (a kind gift from Bert Vogelstein, Johns Hopkins University) were used to  
421 generate stable shScramble or shBRCA2 HCT116<sup>p21-/-</sup> cells using lentiviral transduction. For  
422 viral transduction cells were seeded in 60 mm dishes, and 24 hours post-seeding they were  
423 transduced using optimal viral titer and 8 µg/ml polybrene (#sc-134220, Santa Cruz  
424 Biotechnology). Transduced cells were selected with 1 µg/ml puromycin (#P8833, Sigma-  
425 Aldrich) 24 hours post-transduction, and grown for freezing. Frozen stocks were not used for  
426 more than three weeks after thawing. BRCA2 knockdown was confirmed using quantitative real-  
427 time PCR.

428

429 *Other cell lines and culture conditions*

430 PEO1/PEO4: PEO1 is a BRCA2-deficient ovarian cell line derived from the ascites fluid of a  
431 patient (Langdon et al., 1988; Wolf et al., 1987). PEO4 derives from the same patient after  
432 chemotherapy resistance and has restored BRCA2 function (Sakai et al., 2009; Wolf et al.,  
433 1987). V-C8 and V-C8#13: V-C8 (a kind gift from Bernard Lopez, Gustave Roussy Cancer  
434 Center) is a BRCA2-deficient Chinese hamster lung cell line while V-C8#13 has restored  
435 BRCA2 function via one copy of human chromosome 13 harboring BRCA2 (Kraakman-van der  
436 Zwet et al., 2002). DLD-1/DLD-1<sup>BRCA2-/-</sup> cell lines (# HD PAR-008 and #HD 105-00, Horizon  
437 Discovery Ltd.): DLD-1 cell lines are human colorectal cancer cell lines while the BRCA2-  
438 deficient DLD-1<sup>BRCA2-/-</sup> cell line has BRCA2 exon 11 disrupted with rAAV gene editing technology  
439 (Hucl et al., 2008).

440 PEO4/PEO1, and DLD-1/DLD-1<sup>BRCA2-/-</sup> cell lines were grown in RPMI (#31800-089, Gibco)  
441 supplemented with 10% fetal bovine serum (Natocor) and 1% penicillin/streptomycin. V-  
442 C8#13/V-C8, HCC1937<sup>BRCA1</sup>/HCC1937 (ATCC) and HEK293T (a kind gift from Alejandro  
443 Schinder, Fundación Instituto Leloir) were grown in DMEM (#12800082, Gibco) supplemented  
444 with 10% fetal bovine serum (Natocor) and 1% penicillin/streptomycin. All cell lines were  
445 maintained in a humidified, 5% CO<sub>2</sub> incubator and passaged as needed. Cell lines were  
446 regularly checked for mycoplasma contamination. The BRCA2 and BRCA1 status of all cell  
447 lines was checked and none of the used cell lines are in the list of commonly misidentified cell  
448 lines maintained by the International Cell Line Authentication Committee.

449

450 *Drugs and treatments*

451 Cells were treated 24 hours post-seeding. Treatment times for each experiment, ranging from  
452 24 hours to 6 days, are specified below or in the figure legends. Olaparib (#S1060,  
453 Selleckchem) was resuspended in DMSO and stored at -20°C. ROCK inhibitors, Fasudil HCl  
454 (#A10381, Adooq) and Ripasudil (#S7995, Selleckchem) were resuspended in water and stored  
455 at -80°C. BrdU (Sigma-Aldrich) was resuspended in DMSO and stored at -20°C. BrdU-  
456 containing media (10 uM) was added to cell cultures 15 minutes before harvest. Cisplatin was  
457 resuspended in 0.9% NaCl and stored at -20°C (#P4394, Sigma-Aldrich). Cisplatin was added  
458 to cell cultures for 24 hours. All drug stocks were filter-sterilized (0.2 uM). Unless noted, all  
459 experiments were performed three times.

#### 460 *Survival assay*

461 Cells were seeded in 96 well plates and treated 24 hours post-seeding. HCT116<sup>p21<sup>-/-</sup></sup> cell lines  
462 were seeded at 1500 cells/well, V-C8 at 500 cells/well, PEO at 2500 cells/well and DLD-1/DLD-  
463 1<sup>BRCA2<sup>-/-</sup></sup> at 500 and 1500 cells/well, respectively. Each treatment had three technical replicates.  
464 Six days after treatment, plates were fixed with 2% paraformaldehyde/ 2% sucrose and stained  
465 with DAPI (#10236276001, Roche). Plates were photographed with the IN Cell Analyzer 2200  
466 high content analyzer (GE Healthcare), using a 10x objective. A total of nine pictures per  
467 individual well were taken and all nuclei in the image were automatically counted to assess cell  
468 numbers from each well. Cell number (%) after each treatment was calculated relative to the  
469 total number of cells in untreated wells.

470

#### 471 *Restriction enzyme digest*

472 Genomic DNA from PEO4 and PEO1 cell lines was extracted using phenol-chloroform-isoamyl  
473 alcohol (#P3803, Sigma-Aldrich). A fragment of 694 bp within the BRCA2 gene was PCR  
474 amplified using specific primers (Forward primer: AGATCACAGCTGCCCAAAG, Reverse  
475 primer: TTGCGTTGAGGAACTTGTGAC). PCR fragments were gel purified and equal amounts  
476 of DNA were subject to DrdI (New England Biolabs) enzyme digest following manufacturer's  
477 instructions. Digests were run on an agarose gel and stained with ethidium bromide to visualize  
478 the band pattern.

479

#### 480 *Chromosome aberration analysis*

481 Cells were seeded, treated 24 hours post-treatment and 0.08 µg/ml colcemid (KaryoMAX,  
482 Invitrogen) was added 20 hours before harvest. Following trypsinization, cells pellets were  
483 incubated in hypotonic buffer (KCl 0.0075 M) at 37°C for 4 min and fixed with Carnoy's fixative  
484 (3:1 methanol:glacial acetic acid). Cells were dropped onto slides and air-dried before staining



485 with 6% Giemsa in Sorensen's buffer (2:1 67 mM KH<sub>2</sub>PO<sub>4</sub>:67 mM Na<sub>2</sub>HPO<sub>4</sub>, pH 6.8) for 2  
486 minutes. Pictures of metaphases were taken using an automated Applied Imaging Cytovision  
487 microscope (Leica Biosystems). Fifty metaphase spreads per independent experiment were  
488 analyzed for chromosome gaps, breaks and exchanges.

489

#### 490 *Anaphase aberration assay*

491 To quantify anaphase aberrations (bridges and lagging chromosomes), cells were fixed with 2%  
492 paraformaldehyde/ 2% sucrose for 20 min and stained with DAPI (#10236276001, Roche) to  
493 visualize anaphases. At least 50 anaphases/sample were analyzed. For image acquisition, Z-  
494 stacks were acquired with a Zeiss LSM 510 Meta confocal microscope. Maximum intensity  
495 projections were generated using FIJI (ImageJ) Imaging Software.

496

#### 497 *Micronuclei assay*

498 Micronuclei (MN) analysis were performed using protocols previously described previously  
499 (Federico et al., 2016). Briefly, cells were seeding at low density, treated and incubated with  
500 cytochalasin B (4.5ug/ml, Sigma-Aldrich) for 40 h. Cells were washed twice with PBS and fixed  
501 with PFA/sucrose 2% for 20 min. Phalloidin and DAPI staining were used to visualize whole  
502 cells and nuclei, respectively. 300 binucleated cells were analyzed and the frequency was  
503 calculated as MN/binucleated cells.

504

#### 505 *Immunofluorescence*

506 Cells were seeded on coverslips, treated, fixed for 20 min with 2% paraformaldehyde/ 2%  
507 sucrose and permeabilized for 15 min with 0.1% Triton-X 100. Following 1 hour blocking with  
508 2.5% donkey serum in 0.05% PBS/Tween, coverslips were incubated as needed with primary  
509 antibodies:  $\gamma$ H2A.X S139 (1:1500, #05-636-I, Millipore), 53BP1 (1:1500, #sc-22760, Santa Cruz  
510 Biotechnology), cyclin A (1:1000, #GTX-634-420, GeneTex) or Phalloidin (1:50, #A12379,  
511 Invitrogen). For BrdU staining (1:500, #RPN20AB, GE Healthcare) cells were fixed with ice-cold  
512 methanol (40 sec) and acetone (20 sec), followed by DNA denaturing in 1.5N HCl for 40 min.  
513 For staining of centrosomes (1:1000, #T6557, Sigma-Aldrich) and microtubules (1:1000,  
514 #T9026, Sigma-Aldrich) cells were fixed for 10 min with ice-cold methanol, followed by hydration  
515 with PBS. Following 1 hour of incubation with primary antibodies, cells were washed (3x/10  
516 minutes each) with 0.05% PBS/Tween, incubated for 1 hour with anti-donkey Alexa 488 or 546  
517 (1:200, Invitrogen), washed, stained with DAPI (#10236276001, Roche) and mounted on slides

518 with Mowiol (Sigma-Aldrich). Slides were analyzed with 40x or 100x objectives using an Axio  
519 Observer microscope (Zeiss).

520

#### 521 *FACS*

522 Cells were seeded, treated and harvested at different time points (24 hours-6 days). Cells were  
523 trypsinized, fixed with ice-cold ethanol overnight, and stained with a solution of 100 µg/ml  
524 RNase (#10109142001, Roche) and 50 µg/ml propidium iodide (#P4170, Sigma-Aldrich). A total  
525 of 10,000 events were recorded using a FACSCalibur (BD Biosciences). Cell cycle distribution  
526 was analyzed with the Cytomation Summit software (Dako version 4.3). To assess cell death,  
527 cells were treated as above but following trypsinization they were stained with SYTOX Green  
528 staining following manufacturer's instructions (#S34860, Invitrogen). A total of 10,000 events  
529 were recorded and analyzed using a FACS Aria (BD Biosciences).

530

#### 531 *Quantitative real-time PCR*

532 Total RNA was extracted with TRIzol reagent (Invitrogen), following manufacturer's instructions.  
533 A total of 2 µg of RNA was used as a template for cDNA synthesis using M-MLV reverse  
534 transcriptase (#28025, Invitrogen) and oligo-dT as primer. Quantitative real-time PCR was  
535 performed in a LightCycler 480 II (Roche) using the 5X HOT FIREPol EvaGreen q PCR Mix  
536 Plus (#08-24-00001, Solis BioDyne).

537 To calculate relative expression levels, samples were normalized to GAPDH expression.  
538 Forward (FW) and reverse (RV) primers were as follow: BRCA2 (FW:  
539 AGGGCCACTTTCAAGAGACA, RV:TAGTTGGGGTGGACCACTTG), ROCK1 (FW:  
540 GATATGGCTGGAAGAAACAGTA, RV:TCAGCTCTATACACATCTCCTT), ROCK2  
541 (FW:AGATTATAGCACCTTGCAAAGTA, RV:TATCTTTTTTACCAACCGACTAA), CITK  
542 (FW:CAGGCAAGATTGAGAACG, RV:GCACGATTGAGACAGGGA), EMI1  
543 (FW:TGTTTCAGAAATCAGCAGCCCAG, RV:CAGGTTGCCCGTTGTAAATAGC) and GAPDH  
544 (FW:AGCCTCCCGCTTCGCTCTCT, RV GAGCGATGTGGCTCGGCTGG).

545

#### 546 *siRNA*

547 siRNAs were transfected using JetPrime transfection reagent (Polyplus) following the  
548 manufacturer's instructions. Unless noted, cells were transfected for a total of 48 hours.  
549 siROCK1 (#sc-29473 Santa Cruz Biotechnology) and siROCK2 (#sc-29474, Santa Cruz  
550 Biotechnology) were used at 100 nM. siEMI1 (#sc-37611 Santa Cruz Biotechnology) and siCITK  
551 (#sc-39214 Santa Cruz Biotechnology) were both used at 100 nM.

552

553 *Statistical analysis*

554 GraphPad Prism 5.0 was used for all statistical analyses. Regular two-way ANOVA, followed by  
555 a Bonferroni post-test or Student's t-tests were used as appropriate. BrdU intensity was  
556 analyzed with a Kruskal-Wallis non-parametric test followed by a Dunn's multiple comparison  
557 test. Statistical significance was set at  $p < 0.05$ .

558

559

560 **Conflict of interest**

561 The authors declare that they have no conflicts of interest.

562 Authors María F. Pansa, Israel Gloger, Gerard Drewes and Kevin P. Madauss are affiliated with  
563 GlaxoSmithKline and have no other competing interests to declare.

564

565 **Acknowledgements**

566 We would like to thank Dr. Fernanda Ledda for providing critical reagents for this work. We  
567 would also like to thank all members of the Gottifredi and Soria Laboratories for insightful  
568 comments and discussions. We thank Pamela Rodriguez, Esteban Miglietta, Andrés Hugo  
569 Rossi and Carla Pascuale for technical support with tissue culture, microscopy and flow  
570 cytometry. We also thank the flow cytometry, microscopy, and cell culture facilities of CIBICI-  
571 CONICET for technical support.

572

573 **Funding**

574 This work was supported by a consortium grant of FONCyT and the Trust in Science Program  
575 (Global Health R&D) from GlaxoSmithKline (PAE-GLAXO 2014-0005) to JLB and (PCE-GSK  
576 2017-0032) to GS and PICT 2018-01857 and L'Oréal-UNESCO National Award 2019 to VG.  
577 JLB, GS and VG are researchers from the National Council of Scientific and Technological  
578 Research (CONICET). JM, SOS, NSP and SC were supported by fellowships from the National  
579 Agency for the Promotion of Science and Technology (ANPCyT). SOS, NSP, CG and MFP  
580 were supported by fellowships from CONICET. MFP was supported by a fellowship from the  
581 National Institute of Cancer (Argentina).

582

583 **Author contributions:** GS and VG conceived the original project. GS, VG and KPM supervised  
584 the study. JM, SOS, MFP, ACB, KPM, GS and VG designed the experiments. MFP and SC  
585 performed and analyzed the screening experiments. JM, SOS, CG and NP performed the rest  
586 of the experiments. All authors interpreted and analyzed the data. JM and VG designed the  
587 manuscript and flow of figures. JM and SOS generated the figures. JM and VG wrote the  
588 manuscript. All authors edited the manuscript and agreed to this description of each author's  
589 contributions.

590

591 **Data availability:** The authors confirm that the principal data supporting the findings of this  
592 study are available in Dryad- (Publish and Preserve your Data) in the next DOI

593 <https://doi.org/10.5061/dryad.bvq83bkc5>. Please contact the corresponding authors for any  
594 other request.

595

## 596 **References**

- 597 Adam, S., Rossi, S. E., Moatti, N., De Marco Zompit, M., Xue, Y., Ng, T. F., . . . Durocher, D. (2021). The  
598 CIP2A-TOPBP1 axis safeguards chromosome stability and is a synthetic lethal target for BRCA-  
599 mutated cancer. *Nat Cancer*, *2*(12), 1357-1371. doi: 10.1038/s43018-021-00266-w
- 600 Antoniou, A., Pharoah, P. D. P., Narod, S., Risch, H. A., Eyfjord, J. E., Hopper, J. L., . . . Easton, D. F. (2003).  
601 Average risks of breast and ovarian cancer associated with BRCA1 or BRCA2 mutations detected  
602 in case series unselected for family history: A combined analysis of 22 studies. *American Journal*  
603 *of Human Genetics*, *72*(5), 1117-1130. doi: 10.1086/375033
- 604 Aoki, T., Ueda, S., Kataoka, T., & Satoh, T. (2009). Regulation of mitotic spindle formation by the RhoA  
605 guanine nucleotide exchange factor ARHGEF10. *BMC Cell Biology*, *10*. doi: 10.1186/1471-2121-  
606 10-56
- 607 Bakhom, S. F., Thompson, S. L., Manning, A. L., & Compton, D. A. (2009). Genome stability is ensured by  
608 temporal control of kinetochore-microtubule dynamics. *Nat Cell Biol*, *11*(1), 27-35. doi:  
609 10.1038/ncb1809
- 610 Barber, L. J., Sandhu, S., Chen, L., Campbell, J., Kozarewa, I., Fenwick, K., . . . Ashworth, A. (2013).  
611 Secondary mutations in BRCA2 associated with clinical resistance to a PARP inhibitor. *Journal of*  
612 *Pathology*, *229*(3), 422-429. doi: 10.1002/path.4140
- 613 Brinkley, W. B. R. (1997, 1997). *Microtubules: A brief historical perspective*. Paper presented at the  
614 Journal of Structural Biology.
- 615 Bryant, H. E., Schultz, N., Thomas, H. D., Parker, K. M., Flower, D., Lopez, E., . . . Helleday, T. (2005).  
616 Specific killing of BRCA2-deficient tumours with inhibitors of poly(ADP-ribose) polymerase.  
617 *Nature*, *434*(7035), 913-917. doi: 10.1038/nature03443
- 618 Carbajosa, S., Pansa, M. F., Paviolo, N. S., Castellaro, A. M., Andino, D. L., Nigra, A. D., . . . Soria, G.  
619 (2019). Polo-like kinase 1 inhibition as a therapeutic approach to selectively target BRCA1-  
620 deficient cancer cells by synthetic lethality induction. *Clinical Cancer Research*, *25*(13), 4049-  
621 4062. doi: 10.1158/1078-0432.CCR-18-3516
- 622 Cavanagh, H., & Rogers, K. M. A. (2015). The role of BRCA1 and BRCA2 mutations in prostate, pancreatic  
623 and stomach cancers. *Hereditary Cancer in Clinical Practice*, *13*(1). doi: 10.1186/s13053-015-  
624 0038-x
- 625 Chaudhuri, A. R., Callen, E., Ding, X., Gogola, E., Duarte, A. A., Lee, J. E., . . . Nussenzweig, A. (2016).  
626 Replication fork stability confers chemoresistance in BRCA-deficient cells. *Nature*, *535*(7612),  
627 382-387. doi: 10.1038/nature18325
- 628 Chevrier, V., Piel, M., Collomb, N., Saoudi, Y., Frank, R., Paintrand, M., . . . Job, D. (2002). The Rho-  
629 associated protein kinase p160ROCK is required for centrosome positioning. *Journal of Cell*  
630 *Biology*, *157*(5), 807-817. doi: 10.1083/jcb.200203034
- 631 D'Andrea, A. D. (2018). Mechanisms of PARP inhibitor sensitivity and resistance. *DNA Repair*, *71*, 172-  
632 176. doi: 10.1016/j.dnarep.2018.08.021
- 633 Daniels, M. J., Wang, Y., Lee, M. Y., & Venkitaraman, A. R. (2004). Abnormal cytokinesis in cells deficient  
634 in the breast cancer susceptibility protein BRCA2. *Science*, *306*(5697), 876-879. doi:  
635 10.1126/science.1102574

- 636 Drewry, D. H., Wells, C. I., Andrews, D. M., Angell, R., Al-Ali, H., Axtman, A. D., . . . Willson, T. M. (2017).  
637 Progress towards a public chemogenomic set for protein kinases and a call for contributions.  
638 *PLoS ONE*, *12*(8). doi: 10.1371/journal.pone.0181585
- 639 Ehlén, Å., Martin, C., Miron, S., Julien, M., Theillet, F. X., Ropars, V., . . . Carreira, A. (2020). Proper  
640 chromosome alignment depends on BRCA2 phosphorylation by PLK1. *Nature Communications*,  
641 *11*(1). doi: 10.1038/s41467-020-15689-9
- 642 Elkins, J. M., Fedele, V., Szklarz, M., Abdul Azeez, K. R., Salah, E., Mikolajczyk, J., . . . Zuercher, W. J.  
643 (2016, 2016/01//). *Comprehensive characterization of the Published Kinase Inhibitor Set*. Paper  
644 presented at the Nature Biotechnology.
- 645 Farmer, H., McCabe, H., Lord, C. J., Tutt, A. H. J., Johnson, D. A., Richardson, T. B., . . . Ashworth, A.  
646 (2005). Targeting the DNA repair defect in BRCA mutant cells as a therapeutic strategy. *Nature*,  
647 *434*(7035), 917-921. doi: 10.1038/nature03445
- 648 Federico, M. B., Vallerga, M. B., Radl, A., Paviolo, N. S., Bocco, J. L., Di Giorgio, M., . . . Gottifredi, V.  
649 (2016). Chromosomal Integrity after UV Irradiation Requires FANCD2-Mediated Repair of Double  
650 Strand Breaks. *PLoS Genet*, *12*(1), e1005792. doi: 10.1371/journal.pgen.1005792
- 651 Finardi, A., Massari, L. F., & Visintin, R. (2020). Anaphase Bridges: Not All Natural Fibers Are Healthy.  
652 *Genes (Basel)*, *11*(8). doi: 10.3390/genes11080902
- 653 Fuller, S. D., Gowen, B. E., Reinsch, S., Sawyer, A., Buendia, B., Wepf, R., & Karsenti, E. (1995). The core  
654 of the mammalian centriole contains  $\gamma$ -tubulin. *Current Biology*, *5*(12), 1384-1393. doi:  
655 10.1016/S0960-9822(95)00276-4
- 656 Futreal, P. A., Liu, Q., Shattuck-Eidens, D., Cochran, C., Harshman, K., Tavtigian, S., . . . Wiseman, R.  
657 (1994). BRCA1 mutations in primary breast and ovarian carcinomas. *Science*, *266*(5182), 120-  
658 122. doi: 10.1126/science.7939630
- 659 Ganem, N. J., Godinho, S. A., & Pellman, D. (2009). A mechanism linking extra centrosomes to  
660 chromosomal instability. *Nature*, *460*(7252), 278-282. doi: 10.1038/nature08136
- 661 Ganem, N. J., Storchova, Z., & Pellman, D. (2007). Tetraploidy, aneuploidy and cancer. *Current Opinion in*  
662 *Genetics and Development*, *17*(2), 157-162. doi: 10.1016/j.gde.2007.02.011
- 663 Garcia, I. A., Pansa, M. F., Pacciaroni, A. D. V., Garcia, M. E., Gonzalez, M. L., Oberti, J. C., . . . Soria, G.  
664 (2020). Synthetic Lethal Activity of Benzophenanthridine Alkaloids From *Zanthoxylum coco*  
665 Against BRCA1-Deficient Cancer Cells. *Front Pharmacol*, *11*, 593845. doi:  
666 10.3389/fphar.2020.593845
- 667 Garnock-Jones, K. P. (2014). Ripasudil: First global approval. *Drugs*, *74*(18), 2211-2215. doi:  
668 10.1007/s40265-014-0333-2
- 669 Gelot, C., Magdalou, I., & Lopez, B. S. (2015). Replication stress in mammalian cells and its consequences  
670 for mitosis. *Genes*, *6*(2), 267-298. doi: 10.3390/genes6020267
- 671 Grotzky, D. A., Gonzalez-Suarez, I., Novell, A., Neumann, M. A., Yaddanapudi, S. C., Croke, M., . . .  
672 Gonzalo, S. (2013). BRCA1 loss activates cathepsin L-mediated degradation of 53BP1 in breast  
673 cancer cells. *J Cell Biol*, *200*(2), 187-202. doi: 10.1083/jcb.201204053
- 674 Gumaste, P. V., Penn, L. A., Cymerman, R. M., Kirchhoff, T., Polsky, D., & McLellan, B. (2015). Skin cancer  
675 risk in BRCA1/2 mutation carriers. *British Journal of Dermatology*, *172*(6), 1498-1506. doi:  
676 10.1111/bjd.13626
- 677 Hucl, T., Rago, C., Gallmeier, E., Brody, J. R., Gorospe, M., & Kern, S. E. (2008). A syngeneic variance  
678 library for functional annotation of human variation: Application to BRCA2. *Cancer Research*,  
679 *68*(13), 5023-5030. doi: 10.1158/0008-5472.CAN-07-6189
- 680 Jonsdottir, A. B., Vreeswijk, M. P. G., Wolterbeek, R., Devilee, P., Tanke, H. J., Eyfjörd, J. E., & Szuhai, K.  
681 (2009). BRCA2 heterozygosity delays cytokinesis in primary human fibroblasts. *Cellular*  
682 *Oncology*, *31*(3), 191-201. doi: 10.3233/CLO-2009-0465

- 683 Julian, L., & Olson, M. F. (2014). Rho-associated coiled-coil containing kinases (ROCK), structure,  
684 regulation, and functions. *Small GTPases*, 5(2). doi: 10.4161/sgtp.29846
- 685 King, M. C., Marks, J. H., & Mandell, J. B. (2003). Breast and Ovarian Cancer Risks Due to Inherited  
686 Mutations in BRCA1 and BRCA2. *Science*, 302(5645), 643-646. doi: 10.1126/science.1088759
- 687 Kolinjivadi, A. M., Sannino, V., De Antoni, A., Zadorozhny, K., Kilkenny, M., Técher, H., . . . Costanzo, V.  
688 (2017). Smarcal1-Mediated Fork Reversal Triggers Mre11-Dependent Degradation of Nascent  
689 DNA in the Absence of Brca2 and Stable Rad51 Nucleofilaments. *Molecular Cell*, 67(5), 867-  
690 881.e867. doi: 10.1016/j.molcel.2017.07.001
- 691 Kosako, H., Yoshida, T., Matsumura, F., Ishizaki, T., Narumiya, S., & Inagaki, M. (2000). Rho-kinase/ROCK  
692 is involved in cytokinesis through the phosphorylation of myosin light chain and not  
693 ezrin/radixin/moesin proteins at the cleavage furrow. *Oncogene*, 19(52), 6059-6064. doi:  
694 10.1038/sj.onc.1203987
- 695 Kraakman-van der Zwet, M., Overkamp, W. J. I., van Lange, R. E. E., Essers, J., van Duijn-Goedhart, A.,  
696 Wiggers, I., . . . Zdzienicka, M. Z. (2002). Brca2 (XRCC11) Deficiency Results in Radioresistant DNA  
697 Synthesis and a Higher Frequency of Spontaneous Deletions. *Molecular and Cellular Biology*,  
698 22(2), 669-679. doi: 10.1128/mcb.22.2.669-679.2002
- 699 Krainer, M., Silva-Arrieta, S., FitzGerald, M. G., Shimada, A., Ishioka, C., Kanamaru, R., . . . Haber, D. A.  
700 (1997). Differential contributions of BRCA1 and BRCA2 to early-onset breast cancer. *New*  
701 *England Journal of Medicine*, 336(20), 1416-1421. doi: 10.1056/NEJM199705153362003
- 702 Langdon, S. P., Lawrie, S. S., Hay, F. G., Hawkes, M. M., McDonald, A., Hayward, I. P., . . . Hilgers, J.  
703 (1988). Characterization and Properties of Nine Human Ovarian Adenocarcinoma Cell Lines.  
704 *Cancer Research*, 48(21), 6166-6172.
- 705 Langston, A. A., Malone, K. E., Thompson, J. D., Daling, J. R., & Ostrander, E. A. (1996). BRCA1 mutations  
706 in a population-based sample of young women with breast cancer. *New England Journal of*  
707 *Medicine*, 334(3), 137-142. doi: 10.1056/NEJM199601183340301
- 708 Lee, H. (2014). Cycling with BRCA2 from DNA repair to mitosis. *Experimental Cell Research*, 329(1), 78-  
709 84. doi: 10.1016/j.yexcr.2014.10.008
- 710 Lekomtsev, S., Guizetti, J., Pozniakovskiy, A., Gerlich, D. W., & Petronczki, M. (2010). Evidence that the  
711 tumor-suppressor protein BRCA2 does not regulate cytokinesis in human cells. *Journal of Cell*  
712 *Science*, 123(Pt 9), 1395-1400. doi: 10.1242/jcs.068015
- 713 Lemaçon, D., Jackson, J., Quinet, A., Brickner, J. R., Li, S., Yazinski, S., . . . Vindigni, A. (2017). MRE11 and  
714 EXO1 nucleases degrade reversed forks and elicit MUS81-dependent fork rescue in BRCA2-  
715 deficient cells. *Nature Communications*, 8(1). doi: 10.1038/s41467-017-01180-5
- 716 Ma, Z., Kanai, M., Kawamura, K., Kaibuchi, K., Ye, K., & Fukasawa, K. (2006). Interaction between ROCK II  
717 and Nucleophosmin/B23 in the Regulation of Centrosome Duplication. *Molecular and Cellular*  
718 *Biology*, 26(23), 9016-9034. doi: 10.1128/mcb.01383-06
- 719 Madaule, P., Eda, M., Watanabe, N., Fujisawa, K., Matsuoka, T., Bito, H., . . . Narumiya, S. (1998). Role of  
720 citron kinase as a target of the small GTPase Rho in cytokinesis. *Nature*, 394(6692), 491-494. doi:  
721 10.1038/28873
- 722 McCabe, N., Turner, N. C., Lord, C. J., Kluzek, K., Białkowska, A., Swift, S., . . . Ashworth, A. (2006).  
723 Deficiency in the repair of DNA damage by homologous recombination and sensitivity to  
724 poly(ADP-ribose) polymerase inhibition. *Cancer Research*, 66(16), 8109-8115. doi:  
725 10.1158/0008-5472.CAN-06-0140
- 726 Mijic, S., Zellweger, R., Chappidi, N., Berti, M., Jacobs, K., Mutreja, K., . . . Lopes, M. (2017). Replication  
727 fork reversal triggers fork degradation in BRCA2-defective cells. *Nature Communications*, 8(1).  
728 doi: 10.1038/s41467-017-01164-5

- 729 Miki, Y., Swensen, J., Shattuck-Eidens, D., Futreal, P. A., Harshman, K., Tavtigian, S., . . . Skolnick, M. H.  
730 (1994). A strong candidate for the breast and ovarian cancer susceptibility gene BRCA1. *Science*,  
731 266(5182), 66-71. doi: 10.1126/science.7545954
- 732 Mondal, G., Rowley, M., Guidugli, L., Wu, J., Pankratz, V. S., & Couch, F. J. (2012). BRCA2 Localization to  
733 the Midbody by Filamin A Regulates CEP55 Signaling and Completion of Cytokinesis.  
734 *Developmental Cell*, 23(1), 137-152. doi: 10.1016/j.devcel.2012.05.008
- 735 Moynahan, M. E., Cui, T. Y., & Jasin, M. (2001). Homology-directed DNA repair, mitomycin-C resistance,  
736 and chromosome stability is restored with correction of a Brca1 mutation. *Cancer Research*,  
737 61(12), 4842-4850.
- 738 Murai, J., Huang, S.-Y. N., Renaud, A., Zhang, Y., Ji, J., Takeda, S., . . . Pommier, Y. (2014). Stereospecific  
739 PARP trapping by BMN 673 and comparison with olaparib and rucaparib. *Molecular cancer*  
740 *therapeutics*, 13(2), 433-443. doi: 10.1158/1535-7163.MCT-13-0803
- 741 Murai, J., Huang, S. Y. N., Das, B. B., Renaud, A., Zhang, Y., Doroshow, J. H., . . . Pommier, Y. (2012).  
742 Trapping of PARP1 and PARP2 by clinical PARP inhibitors. *Cancer Research*, 72(21), 5588-5599.  
743 doi: 10.1158/0008-5472.CAN-12-2753
- 744 Nakagawa, O., Fujisawa, K., Ishizaki, T., Saito, Y., Nakao, K., & Narumiya, S. (1996). ROCK-I and ROCK-II,  
745 two isoforms of Rho-associated coiled-coil forming protein serine/threonine kinase in mice.  
746 *FEBS Letters*, 392(2), 189-193. doi: 10.1016/0014-5793(96)00811-3
- 747 Nigg, E. A. (2007). Centrosome duplication: of rules and licenses. *Trends in Cell Biology*, 17(5), 215-221.  
748 doi: 10.1016/j.tcb.2007.03.003
- 749 Noordermeer, S. M., & van Attikum, H. (2019). PARP Inhibitor Resistance: A Tug-of-War in BRCA-  
750 Mutated Cells. *Trends in Cell Biology*, 29(10), 820-834. doi: 10.1016/j.tcb.2019.07.008
- 751 Oku, Y., Tareyanagi, C., Takaya, S., Osaka, S., Ujiie, H., Yoshida, K., . . . Uehara, Y. (2014). Multimodal  
752 effects of small molecule ROCK and LIMK inhibitors on mitosis, and their implication as anti-  
753 leukemia agents. *PLoS ONE*, 9(3). doi: 10.1371/journal.pone.0092402
- 754 Okuda, M., Horn, H. F., Tarapore, P., Tokuyama, Y., Smulian, A. G., Chan, P. K., . . . Fukasawa, K. (2000).  
755 Nucleophosmin/B23 is a target of CDK2/cyclin E in centrosome duplication. *Cell*, 103(1), 127-  
756 140. doi: 10.1016/S0092-8674(00)00093-3
- 757 Pal, T., Permeth-Wey, J., Betts, J. A., Krischer, J. P., Fiorica, J., Arango, H., . . . Sutphen, R. (2005). BRCA1  
758 and BRCA2 mutations account for a large proportion of ovarian carcinoma cases. *Cancer*,  
759 104(12), 2807-2816. doi: 10.1002/cncr.21536
- 760 Panzarino, N. J., Kraus, J. J., Cong, K., Peng, M., Mosqueda, M., Nayak, S. U., . . . Cantor, S. B. (2021).  
761 Replication Gaps Underlie BRCA Deficiency and Therapy Response. *Cancer Res*, 81(5), 1388-  
762 1397. doi: 10.1158/0008-5472.CAN-20-1602
- 763 Patel, K. J., Yu, V. P. C. C., Lee, H., Corcoran, A., Thistlethwaite, F. C., Evans, M. J., . . . Venkitaraman, A. R.  
764 (1998). Involvement of Brca2 in DNA repair. *Molecular Cell*, 1(3), 347-357. doi: 10.1016/S1097-  
765 2765(00)80035-0
- 766 Prakash, R., Zhang, Y., Feng, W., & Jasin, M. (2015). Homologous recombination and human health: The  
767 roles of BRCA1, BRCA2, and associated proteins. *Cold Spring Harbor Perspectives in Biology*, 7(4).  
768 doi: 10.1101/cshperspect.a016600
- 769 Reimann, J. D., Freed, E., Hsu, J. Y., Kramer, E. R., Peters, J. M., & Jackson, P. K. (2001). Emi1 is a mitotic  
770 regulator that interacts with Cdc20 and inhibits the anaphase promoting complex. *Cell*, 105(5),  
771 645-655. doi: 10.1016/s0092-8674(01)00361-0
- 772 Rein, I. D., Landsverk, K. S., Micci, F., Patzke, S., & Stokke, T. (2015). Replication-induced DNA damage  
773 after PARP inhibition causes G2 delay, and cell line-dependent apoptosis, necrosis and  
774 multinucleation. *Cell Cycle*, 14(20), 3248-3260. doi: 10.1080/15384101.2015.1085137



- 775 Robu, M. E., Zhang, Y., & Rhodes, J. (2012). Rereplication in emi1-deficient zebrafish embryos occurs  
776 through a Cdh1-mediated pathway. *PLoS ONE*, 7(10), e47658. doi:  
777 10.1371/journal.pone.0047658
- 778 Rosenblatt, J., Cramer, L. P., Baum, B., & McGee, K. M. (2004). Myosin II-dependent cortical movement  
779 is required for centrosome separation and positioning during mitotic spindle assembly. *Cell*,  
780 117(3), 361-372. doi: 10.1016/S0092-8674(04)00341-1
- 781 Rowley, M., Ohashi, A., Mondal, G., Mills, L., Yang, L., Zhang, L., . . . Couch, F. J. (2011). Inactivation of  
782 Brca2 promotes Trp53-associated but inhibits KrasG12D-dependent pancreatic cancer  
783 development in mice. *Gastroenterology*, 140(4), 1303-1313.e1303. doi:  
784 10.1053/j.gastro.2010.12.039
- 785 Sahin, I., Kawano, Y., Sklavenitis-Pistofidis, R., Moschetta, M., Mishima, Y., Manier, S., . . . Ghobrial, I. M.  
786 (2019). Citron Rho-interacting kinase silencing causes cytokinesis failure and reduces tumor  
787 growth in multiple myeloma. *Blood Adv*, 3(7), 995-1002. doi:  
788 10.1182/bloodadvances.2018028456
- 789 Sakai, W., Swisher, E. M., Jacquemont, C., Chandramohan, K. V., Couch, F. J., Langdon, S. P., . . .  
790 Taniguchi, T. (2009). Functional restoration of BRCA2 protein by secondary BRCA2 mutations in  
791 BRCA2-mutated ovarian carcinoma. *Cancer Research*, 69(16), 6381-6386. doi: 10.1158/0008-  
792 5472.CAN-09-1178
- 793 Saladino, C., Bourke, E., Conroy, P. C., & Morrison, C. G. (2009). Centriole separation in DNA damage-  
794 induced centrosome amplification. *Environmental and Molecular Mutagenesis*, 50(8), 725-732.  
795 doi: 10.1002/em.20477
- 796 Schlacher, K., Christ, N., Siaud, N., Egashira, A., Wu, H., & Jasin, M. (2011). Double-strand break repair-  
797 independent role for BRCA2 in blocking stalled replication fork degradation by MRE11. *Cell*,  
798 145(4), 529-542. doi: 10.1016/j.cell.2011.03.041
- 799 Schoonen, P. M., Talens, F., Stok, C., Gogola, E., Heijink, A. M., Bouwman, P., . . . Van Vugt, M. A. T. M.  
800 (2017). Progression through mitosis promotes PARP inhibitor-induced cytotoxicity in  
801 homologous recombination-deficient cancer cells. *Nature Communications*, 8. doi:  
802 10.1038/ncomms15981
- 803 Schoonen, P. M., & van Vugt, M. A. T. M. (2018). Never tear us a-PARP: Dealing with DNA lesions during  
804 mitosis. *Molecular & cellular oncology*, 5(1), e1382670-e1382670. doi:  
805 10.1080/23723556.2017.1382670
- 806 Shailani, A., Kaur, R. P., & Munshi, A. (2018). A comprehensive analysis of BRCA2 gene: focus on  
807 mechanistic aspects of its functions, spectrum of deleterious mutations, and therapeutic  
808 strategies targeting BRCA2-deficient tumors. *Med Oncol*, 35(3), 18. doi: 10.1007/s12032-018-  
809 1085-8
- 810 Shi, J., & Wei, L. (2013). Rho kinases in cardiovascular physiology and pathophysiology: The effect of  
811 fasudil. *Journal of Cardiovascular Pharmacology*, 62(4), 341-354. doi:  
812 10.1097/FJC.0b013e3182a3718f
- 813 Shimizu, N., Nakajima, N. I., Tsunematsu, T., Ogawa, I., Kawai, H., Hirayama, R., . . . Kudo, Y. (2013).  
814 Selective enhancing effect of early mitotic inhibitor 1 (Emi1) depletion on the sensitivity of  
815 doxorubicin or X-ray treatment in human cancer cells. *J Biol Chem*, 288(24), 17238-17252. doi:  
816 10.1074/jbc.M112.446351
- 817 Shindo, N., Otsuki, M., Uchida, K. S. K., & Hirota, T. (2021). Prolonged mitosis causes separase  
818 deregulation and chromosome nondisjunction. *Cell Rep*, 34(3), 108652. doi:  
819 10.1016/j.celrep.2020.108652
- 820 Shive, H. R., West, R. R., Embree, L. J., Azuma, M., Sood, R., Liu, P., & Hicksteina, D. D. (2010). Brca2 in  
821 zebrafish ovarian development, spermatogenesis, and tumorigenesis. *Proceedings of the*

- 822 *National Academy of Sciences of the United States of America*, 107(45), 19350-19355. doi:  
823 10.1073/pnas.1011630107
- 824 Siri, S. O., Martino, J., & Gottifredi, V. (2021). Structural Chromosome Instability: Types, Origins,  
825 Consequences, and Therapeutic Opportunities. *Cancers (Basel)*, 13(12). doi:  
826 10.3390/cancers13123056
- 827 Stronach, E. A., Alfraidi, A., Rama, N., Datler, C., Studd, J. B., Agarwal, R., . . . Gabra, H. (2011). HDAC4-  
828 regulated STAT1 activation mediates platinum resistance in ovarian cancer. *Cancer Research*,  
829 71(13), 4412-4422. doi: 10.1158/0008-5472.CAN-10-4111
- 830 Stukova, M., Hall, M. D., Tsotsoros, S. D., Madigan, J. P., Farrell, N. P., & Gottesman, M. M. (2015).  
831 Reduced accumulation of platinum drugs is not observed in drug-resistant ovarian cancer cell  
832 lines derived from cisplatin-treated patients. *Journal of Inorganic Biochemistry*, 149, 45-48. doi:  
833 10.1016/j.jinorgbio.2015.05.003
- 834 Tagliatalata, A., Alvarez, S., Leuzzi, G., Sannino, V., Ranjha, L., Huang, J. W., . . . Ciccina, A. (2017).  
835 Restoration of Replication Fork Stability in BRCA1- and BRCA2-Deficient Cells by Inactivation of  
836 SNF2-Family Fork Remodelers. *Molecular Cell*, 68(2), 414-430.e418. doi:  
837 10.1016/j.molcel.2017.09.036
- 838 Tomlinson, G. E., Chen, T. T. L., Stastny, V. A., Virmani, A. K., Spillman, M. A., Tonk, V., . . . Gazdar, A. F.  
839 (1998). Characterization of a breast cancer cell line derived from a germ-line BRCA1 mutation  
840 carrier. *Cancer Research*, 58(15), 3237-3242.
- 841 Treszezamsky, A. D., Kachnic, L. A., Feng, Z., Zhang, J., Tokadjian, C., & Powell, S. N. (2007). BRCA1- and  
842 BRCA2-deficient cells are sensitive to etoposide-induced DNA double-strand breaks via  
843 topoisomerase II. *Cancer Research*, 67(15), 7078-7081. doi: 10.1158/0008-5472.CAN-07-0601
- 844 Tutt, A., Gabriel, A., Bertwistle, D., Connor, F., Paterson, H., Peacock, J., . . . Ashworth, A. (1999). Absence  
845 of Brca2 causes genome instability by chromosome breakage and loss associated with  
846 centrosome amplification. *Current Biology*, 9(19), 1107-1110. doi: 10.1016/S0960-  
847 9822(99)80479-5
- 848 Utani, K., Kohno, Y., Okamoto, A., & Shimizu, N. (2010). Emergence of micronuclei and their effects on  
849 the fate of cells under replication stress. *PLoS ONE*, 5(4), e10089. doi:  
850 10.1371/journal.pone.0010089
- 851 Vencken, P. M. L. H., Kriege, M., Hoogwerf, D., Beugelink, S., Van Der Burg, M. E. L., Hooning, M. J., . . .  
852 Seynaeve. (2011). Chemosensitivity and outcome of BRCA1- and BRCA2-associated ovarian  
853 cancer patients after first-line chemotherapy compared with sporadic ovarian cancer patients.  
854 *Annals of Oncology*, 22, 1346-1352. doi: 10.1093/annonc/mdq628
- 855 Venkitaraman, A. R. (2014). Cancer suppression by the chromosome custodians, BRCA1 and BRCA2.  
856 *Science*, 343(6178), 1470-1475. doi: 10.1126/science.1252230
- 857 Verschuren, E. W., Ban, K. H., Masek, M. A., Lehman, N. L., & Jackson, P. K. (2007). Loss of Emi1-  
858 dependent anaphase-promoting complex/cyclosome inhibition deregulates E2F target  
859 expression and elicits DNA damage-induced senescence. *Mol Cell Biol*, 27(22), 7955-7965. doi:  
860 10.1128/MCB.00908-07
- 861 Wang, H. F., Takenaka, K., Nakanishi, A., & Miki, Y. (2011). BRCA2 and nucleophosmin coregulate  
862 centrosome amplification and form a complex with the Rho effector kinase ROCK2. *Cancer  
863 Research*, 71(1), 68-77. doi: 10.1158/0008-5472.CAN-10-0030
- 864 Whicker, M. E., Lin, Z. P., Hanna, R., Sartorelli, A. C., & Ratner, E. S. (2016). MK-2206 sensitizes BRCA-  
865 deficient epithelial ovarian adenocarcinoma to cisplatin and olaparib. *BMC Cancer*, 16(1). doi:  
866 10.1186/s12885-016-2598-1
- 867 Wolf, C. R., Hayward, I. P., Lawrie, S. S., Buckton, K., McIntyre, M. A., Adams, D. J., . . . Smyth, J. F. (1987).  
868 Cellular heterogeneity and drug resistance in two ovarian adenocarcinoma cell lines derived

869 from a single patient. *International Journal of Cancer*, 39(6), 695-702. doi:  
870 10.1002/ijc.2910390607  
871 Wooster, R., Bignell, G., Lancaster, J., Swift, S., Seal, S., Mangion, J., . . . Stratton, M. R. (1995).  
872 Identification of the breast cancer susceptibility gene BRCA2. *Nature*, 378(6559), 789-792. doi:  
873 10.1038/378789a0  
874 Yang, D., Khan, S., Sun, Y., Hess, K., Shmulevich, I., Sood, A. K., & Zhang, W. (2011). Association of BRCA1  
875 and BRCA2 mutations with survival, chemotherapy sensitivity, and gene mutator phenotype in  
876 patients with ovarian cancer. *JAMA - Journal of the American Medical Association*, 306(14),  
877 1557-1565. doi: 10.1001/jama.2011.1456  
878 Yokoyama, T., Goto, H., Izawa, I., Mizutani, H., & Inagaki, M. (2005). Aurora-B and Rho-kinase/ROCK, the  
879 two cleavage furrow kinases, independently regulate the progression of cytokinesis: Possible  
880 existence of a novel cleavage furrow kinase phosphorylates ezrin/radixin/moesin (ERM). *Genes  
881 to Cells*, 10(2), 127-137. doi: 10.1111/j.1365-2443.2005.00824.x  
882 Yu, V. P. C. C., Koehler, M., Steinlein, C., Schmid, M., Hanakahi, L. A., Van Gool, A. J., . . . Venkitaraman, A.  
883 R. (2000). Gross chromosomal rearrangements and genetic exchange between nonhomologous  
884 chromosomes following BRCA2 inactivation. *Genes and Development*, 14(11), 1400-1406. doi:  
885 10.1101/gad.14.11.1400  
886 Zhang, S., Royer, R., Li, S., McLaughlin, J. R., Rosen, B., Risch, H. A., . . . Narod, S. A. (2011). Frequencies of  
887 BRCA1 and BRCA2 mutations among 1,342 unselected patients with invasive ovarian cancer.  
888 *Gynecologic Oncology*, 121(2), 353-357. doi: 10.1016/j.ygyno.2011.01.020  
889

890

891 **Figure 1. Phenotypic screening identifies ROCK kinases as potential targets for synthetic**  
892 **lethality in BRCA2 cells. A)** The screening assay consists in the co-culture of isogenic  
893 BRCA-proficient and BRCA-deficient cell lines in equal proportions on each well of 96-well  
894 plates. For this, double stable cell lines tagged with different fluorescent proteins (CFP, iRFP,  
895 and mCherry) and expressing shRNAs for Scramble, BRCA1 or BRCA2 were generated as  
896 described in (Carbajosa et al., 2019). **B)** Quantitative real-time PCR of BRCA2 in shScramble  
897 and shBRCA2 HCT116<sup>p21<sup>-/-</sup></sup> cells (N=2). **C)** Relative cell number (%) of HCT116<sup>p21<sup>-/-</sup></sup> cells  
898 expressing shScramble and shBRCA2 and treated with the indicated concentrations of Olaparib  
899 (N=2). **D)** Schematic timeline of the screening protocol and examples of results from each well.  
900 A tested compound can be “non synthetic lethal” (the ratio between the populations' percentage  
901 remains unchanged when compared to the ratio used for seeding- ~33% for each cell line); or  
902 “synthetic lethal” (the ratio between cell types is altered when compared to the ratio used for  
903 seeding, with selective depletion of cells within the BRCA1- and/or BRCA2-deficient  
904 populations). **E)** Screening results of PKIS2 library compounds (0.1 uM) in shBRCA2  
905 HCT116<sup>p21<sup>-/-</sup></sup> cells. Compounds were plotted based on their fold of SL (y axis) and their survival  
906 difference (x axis). A compound was considered a “hit” if it exhibited a >5 standard deviation on  
907 these two variables. Fold of SL (y axis): the ratios of the different populations in each individual  
908 well. Survival difference (x axis): compares treated cells with the untreated control in the same  
909 plate. ROCK inhibitors and other inhibitors are plotted in red and grey, respectively. For  
910 statistical analysis of the screening, please refer to Carbajosa et al. (2019). **F)** Relative cell  
911 number (%) of shScramble and shBRCA2 HCT116<sup>p21<sup>-/-</sup></sup> cells at different ROCK inhibitors.  
912 Statistical analysis was performed with a two-way ANOVA followed by a Bonferroni post-test  
913 (\*p<0.05, \*\*p<0.01, \*\*\*p<0.001). Data in B-C are shown as the average of 2-3 independent  
914 experiments with the standard error of the mean.

915

916 **Figure 2. BRCA2-deficient cells are selectively killed by the ROCK kinase inhibitor**  
917 **Fasudil. A)** Relative cell number (%) of shScramble and shBRCA2 HCT116<sup>p21<sup>-/-</sup></sup> cells after 6  
918 days of treatment with Fasudil (N=3). **B)** Relative cell number (%) of DLD-1<sup>WT</sup> and DLD-1<sup>BRCA2<sup>-/-</sup></sup>  
919 after 6 days of treatment with Fasudil (N=2). **C)** Relative cell number (%) of V-C8#13 and V-C8  
920 cells after 6 days of treatment with Fasudil (N=3). **D)** Relative cell number (%) of PEO4 and  
921 PEO1 cells after 6 days of treatment with Fasudil (N=2). Panels A-D: the cell cartoon shows the  
922 BRCA2 status of the modification introduced at last in each pair of cell lines (see Material and  
923 Methods for further details). Black borders indicate that the modification generated a BRCA2

924 proficient status and blue borders indicates BRCA2 deficiency. **E)** FACS analysis of SYTOX  
925 green-stained PEO4 and PEO1 cells 6 days after Fasudil treatment (128 uM, N=2). Statistical  
926 analysis was performed with a two-way ANOVA followed by a Bonferroni post-test (\* $p < 0.05$ ,  
927 \*\* $p < 0.01$ , \*\*\* $p < 0.001$ ). Data in A-D are shown as the average of 2-3 independent experiments  
928 with the standard error of the mean.

929

930 **Figure 3. Fasudil does not induce acute replication stress in BRCA2-deficient cells. A)**  
931 Percent of shScramble or shBRCA2 HCT116<sup>p21<sup>-/-</sup></sup> cells with >5 53BP1 foci (N=3) and  
932 representative images of the treatments. A total of 300-400 cells were analyzed per  
933 independent experiment. Cells were treated for 48 hours. **B)** Percent of shScramble or  
934 shBRCA2 HCT116<sup>p21<sup>-/-</sup></sup> cells with >35  $\gamma$ -H2A.X foci (N=3) and representative images of the  
935 treatments. A total of 300-400 cells were analyzed per independent experiment. Cells were  
936 treated for 48 hours. **C)** Percent of PEO4 and PEO1 cells with >35  $\gamma$ -H2A.X foci (N=2). A total of  
937 300-400 cells were analyzed per independent experiment. **D)** Percent of PEO4 and PEO1 cells  
938 stained with BrdU after 3 and 6 days of Fasudil treatment (128 uM, N=2). A total of 500 cells  
939 were analyzed for each sample. Representative images of PEO1 cells after 3 days of Fasudil  
940 treatment (BrdU shown in green, DAPI shown in blue). Statistical analysis was performed using  
941 a two-way ANOVA followed by a Bonferroni post-test (\* $p < 0.05$ , \*\* $p < 0.01$ , \*\*\* $p < 0.001$ ). Data are  
942 shown as the average of 2-3 independent experiments with the standard error of the mean.

943

944 **Figure 4. Fasudil treatment induces polyploidy and aberrant mitotic figures in BRCA2**  
945 **deficient cells. A-B)** Cell cycle analysis of PEO4 and PEO1 cells following 3 or 6 days of  
946 Fasudil treatment (96 and 128 uM) (N=3). Cells were stained with propidium iodide and DNA  
947 content was analyzed via FACS (10,000 events per sample). **C)** Cell cycle analysis of PEO4  
948 and PEO1 cells following a time course with Fasudil treatment (N=2) (1-5 days, 64 uM). Cells  
949 were stained with propidium iodide and DNA content was analyzed via FACS (10,000 events  
950 per sample) **D)** Representative images of DAPI-stained normal and aberrant metaphases.  
951 Aberrant metaphases include metaphases with DNA being pulled in multiple directions or  
952 metaphases with misaligned chromosomes. **E)** Percent of aberrant metaphases in PEO4 and  
953 PEO1 cells 3 or 6 days after Fasudil treatment (N=3) (128 uM). A total of 100 metaphases were  
954 analyzed for each sample. Statistical analysis was performed using a two-way ANOVA followed  
955 by a Bonferroni post-test (\* $p < 0.05$ , \*\* $p < 0.01$ , \*\*\* $p < 0.001$ ). Data in E are shown as the average  
956 of 2-3 independent experiments with the standard error of the mean.

957

958

959 **Figure 5. Mitotic DNA bridges accumulate in BRCA2-deficient cells following ROCK**  
960 **inhibition with Fasudil. A)** Representative images of normal and abnormal anaphases with  
961 bridges and lagging chromosomes. **B)** Percentage of anaphases with chromosomes bridges  
962 and lagging chromosomes in PEO4 and PEO1 cells treated with Fasudil (128 uM). A total of 50-  
963 70 anaphases per sample were analyzed in 2 independent experiments (N=2). **C)** Percentage  
964 of anaphases with chromosomes bridges and lagging chromosome in shScramble- or  
965 shBRCA2-transduced HCT116p21<sup>-/-</sup> cells treated with Fasudil. A total of 50-70 anaphases per  
966 sample were analyzed per independent experiment (N=3). **D)** Quantitative real-time PCR of  
967 ROCK1 and ROCK2 in shBRCA2 HCT116<sup>p21<sup>-/-</sup></sup> cells transfected with 150 uM of siROCK1 or  
968 siROCK2 (N=2). **E)** Percentage of anaphases with chromosomes bridges and laggars in  
969 shBRCA2 HCT116p21<sup>-/-</sup> cells transfected with siROCK (1+2). A total of 50-70 anaphases per  
970 sample were analyzed per in three independent experiments (N=3). The statistical analysis of  
971 the data was performed with a two-way ANOVA followed by a Bonferroni post-test (\*p<0.05,  
972 \*\*p<0.01, \*\*\*p<0.001). Data in B-D are shown as the average of 2-3 independent experiments  
973 with the standard error of the mean.

974

975 **Figure 6. BRCA2-deficient cells exhibit cytokinesis failure, centrosome amplification and**  
976 **multipolar mitotic spindles following Fasudil treatment. A)** Representative pictures of PEO1  
977 cells after Fasudil treatment. Nuclei are stained with DAPI (shown in blue) and individual  
978 cytoplasm are stained with Phalloidin which stains the actin cytoskeleton (shown in green). **B)**  
979 Percent of binucleated and multinucleated PEO4 and PEO1 cells after 3 days of Fasudil  
980 treatment (N=3, 128 uM). **C)** Percent of binucleated and multinucleated number of PEO4 and  
981 PEO1 cells after 6 days of Fasudil treatment (N=3, 128 uM). A total of 200 cells were analyzed  
982 per sample. **D)** Representative pictures of PEO1 metaphases showing cells with normal and  
983 abnormal mitotic spindles. DNA, centrosomes, and microtubules are shown in blue, red, and  
984 green, respectively. **E)** Percent of metaphases in PEO4 and PEO1 cells with multipolar spindles  
985 after 3 days of Fasudil treatment (N=3, 128 uM). **F)** Percent of metaphase in PEO4 and PEO1  
986 cells with multipolar spindles after 6 days of Fasudil treatment (N=3, 128 uM). Mitotic spindles  
987 were visualized by staining centrosomes ( $\gamma$ -tubulin) and microtubules ( $\alpha$ -tubulin) and DNA was  
988 stained with DAPI. Cells were classified as having 3 spindles, 4 spindles or 5 spindles or more.  
989 A total of 100 metaphases were analyzed per sample. Statistical analysis was performed using  
990 a two-way ANOVA followed by a Bonferroni post-test (\*p<0.05, \*\*p<0.01, \*\*\*p<0.001). Data in

991 B, C, E and F are shown as the average of 2-3 independent experiments with the standard error  
992 of the mean.  
993

994 **Figure 7. Mitosis as an alternative synthetic lethality strategy for BRCA2 deficient cells.**  
995 **A)** Quantitative real-time PCR of CITK in shBRCA2 HCT116<sup>p21-/-</sup> cells transfected with 150 uM  
996 of siCITK (N=2). **B)** Relative cell number (%) of PEO4 and PEO1 after 6 days of being  
997 transfected with siROCK (1+2), siCITK or siROCK (1+2)/siCITK and representative images of  
998 the transfected cells (N=2). **C)** Percent of binucleated PEO1 cells transfected with siROCK  
999 (1+2), CITK or siROCK (1+2)/siCITK (N=2). **D)** Quantitative real-time PCR of EMI1 in shBRCA2  
1000 HCT116<sup>p21-/-</sup> cells transfected with 150 uM of siEMI1 (N=2). **E)** Relative cell number (%) of  
1001 PEO4 and PEO1 after 6 days of being transfected with siEMI1 and treated with Fasudil (N=2).  
1002 Representative images of the transfected and treated cells. **F)** Cell cycle analysis of PEO1 cells  
1003 following transfection with siEMI1 for 48hs (N=2). Cells were stained with propidium iodide and  
1004 DNA content was analyzed via FACS (10,000 events per sample). **G)** Model depicting the  
1005 events leading to BRCA2-deficient cell death after Fasudil treatment. The inhibition or depletion  
1006 of ROCK kinases in BRCA2-deficient cells leads to cytokinesis failure. As a result, the daughter  
1007 cells are binucleated (4N) and have extra centrosomes (two instead of one). After DNA  
1008 duplication, these cells can attempt mitosis. Mitosis entry with increased DNA content and extra  
1009 centrosomes may very frequently give rise to abnormal and multipolar spindles, which leads to  
1010 misaligned chromosomes and mitotic failure due to multipolar spindle formation. Alternatively,  
1011 cytokinesis may fail again and cells may temporarily survive as multinucleated cells possibly  
1012 facing cell death during subsequent mitotic attempts. Data in A-E are shown as the average of  
1013 2-3 independent experiments with the standard error of the mean.

1014

#### 1015 **Supplementary Figure legends**

1016

1017 **Figure 1- figure supplement 1. BRCA2-deficient cells are sensitive to the ROCK kinase**  
1018 **inhibitor Ripasudil.** **A)** Table listing all ROCK inhibitors from the PKIS2 library and their  
1019 corresponding survival difference. **B)** Relative cell number (%) of V-C8#13 and V-C8 cells after  
1020 6 days of treatment with Ripasudil (N=2). **C)** Relative cell number (%) of PEO4 and PEO1 cells  
1021 after 6 days of treatment with Ripasudil (N=2). **D)** Relative cell number (%) of HCC1937<sup>BRCA1</sup>  
1022 and HCC1937 cells after 6 days of treatment with Olaparib (N=2). **E)** Relative cell number (%) of  
1023 HCC1937<sup>BRCA1</sup> and HCC1937 cells after 6 days of treatment with Fasudil (N=3). **F)** Relative cell

1024 number (%) of HCC1937<sup>BRCA1</sup> and HCC1937 cells after 6 days of treatment with Ripasudil  
1025 (N=2). **G**) Quantitative real-time PCR of BRCA1 in shScramble and shBRCA1 HCT116<sup>p21<sup>-/-</sup></sup> cells.  
1026 **H**) Relative cell number (%) of shScramble and shBRCA1 HCT116<sup>p21<sup>-/-</sup></sup> cells after 6 days of  
1027 treatment with Olaparib (N=2). **I**) Relative cell number (%) of shScramble and shBRCA1  
1028 HCT116<sup>p21<sup>-/-</sup></sup> cells after 6 days of treatment with Fasudil (N=2). Statistical analysis was  
1029 performed with a two-way ANOVA followed by a Bonferroni post-test (\*p<0.05, \*\*p<0.01,  
1030 \*\*\*p<0.001). Data in B-I are shown as the average of 2-3 independent experiments with the  
1031 standard error of the mean. Panel B-F and H-I: the cell cartoon shows the BRCA2 or BRCA1  
1032 status of the modification introduced at last in each pair of cell lines (see Material and Methods  
1033 for further details). Black borders indicate that the modification generated a BRCA2 or BRCA1  
1034 proficient status, blue borders indicates BRCA2 deficiency and red border, BRCA1 deficiency.

1035  
1036 **Figure 2- figure supplement 1. BRCA2-deficient cells are sensitive to Olaparib. A)** Relative  
1037 cell number (%) of shScramble and shBRCA2 HCT116<sup>p21<sup>-/-</sup></sup> (N=3), DLD-1<sup>WT</sup> and DLD-1<sup>BRCA2<sup>-/-</sup></sup>  
1038 (N=2), and V-C8#13 and V-C8 (N=4) cells after 6 days of treatment with Olaparib. **B)** Relative  
1039 cell number (%) of PEO4 and PEO1 cells after 6 days of treatment with Olaparib (N=2). **C)**  
1040 Nucleotide sequence (TAC, tyrosine) of aminoacid #1655 of the BRCA2 reference sequence  
1041 NM\_000059.3, and the nucleotide sequences found in PEO1 (TAG, stop codon) and PEO4  
1042 (TAT, tyrosine). Schematic of a fragment sequence of BRCA2 showing the primers (highlighted  
1043 in magenta) used to amplify a 694 bp fragment around aminoacid #1655. The PEO1 mutation  
1044 site TAG is highlighted in red. The DrdI enzyme digestion site is highlighted in yellow. **D)**  
1045 Agarose gel showing undigested and digested (DrdI enzyme) products of a 694 bp fragment of  
1046 the BRCA2 gene from PEO4 and PEO1 cells (Black arrow head). The nonsense mutation in  
1047 PEO1 (BRCA2-deficient cell lines) generates a cut site for the DrdI enzyme giving rise to two  
1048 digestion products of 480 bp and 214 bp (Blue arrow head). **E)** Relative cell number (%) of  
1049 PEO4 and PEO1 cells treated with cisplatin (24 hours) followed by 5 days of growth in cisplatin-  
1050 free media (N=2). Data in A, B and E are shown as the average of three technical replicates  
1051 with the standard deviation. Panels A-E: Statistical analysis was performed using a t-test  
1052 (\*p<0.05, \*\*p<0.01, \*\*\*p<0.001).

1053  
1054 **Figure 3- figure supplement 1. Fasudil does not alter S phase in BRCA2-deficient cells. A)**  
1055 BrdU intensity in experiments from Figure 3D. PEO4 (grey circles) and PEO1 (blue circles) cells  
1056 after 3 or 6 days of Fasudil treatment (128 uM, N= 2). A total of 500 cells were analyzed for  
1057 each sample. Individual intensity values per cells are displayed as a scatter plot and the



1058 average and standard deviation of each population are shown. Statistical analysis was done  
1059 with a Kruskal-Wallis non-parametric test followed by a Dunn's multiple comparison test  
1060 (\* $p < 0.05$ , \*\* $p < 0.01$ , \*\*\* $p < 0.001$ ).

1061

1062 **Figure 3 - figure supplement 2. BRCA2-deficient cells treated with Fasudil do not display**  
1063 **replication stress-derived chromosome defects. A)** Frequency of chromosome aberrations  
1064 in shScramble or shBRCA2 HCT116<sup>p21<sup>-/-</sup></sup> cells following treatment with Olaparib (0.5  $\mu$ M) or  
1065 Fasudil (32  $\mu$ M) (N=3). A total of 50 metaphases were analyzed per condition. Chromosome  
1066 aberrations include chromatid breaks and chromatid exchanges. Representative images of a  
1067 chromatid break and a chromatid exchange are shown on the right. **B)** Percent of shScramble  
1068 or shBRCA2 HCT116<sup>p21<sup>-/-</sup></sup> cells with micronuclei in binucleated cells (N=3). On the right,  
1069 representative image of binucleated cells with and without micronuclei. 24 hours after seeding  
1070 cells were treated with the indicated inhibitors and 24 hours later with cytochalasin B for 30  
1071 hours. A total of 300-400 cells were analyzed per independent experiment. Statistical analysis  
1072 of all figures was performed with a two-way ANOVA followed by a Bonferroni post-test (\* $p < 0.05$ ,  
1073 \*\* $p < 0.01$ , \*\*\* $p < 0.001$ ). Data are shown as the average of 2-3 independent experiments with the  
1074 standard error of the mean.

1075

1076 **Figure 6 - figure supplement 1. Multinucleated BRCA2-deficient cells resulting from**  
1077 **Fasudil treatment are able to transit through S phase. A)** Percent of binucleated PEO1 cells  
1078 transfected with siROCK (1+2) or treated with Fasudil (N=2). **B)** Percent of binucleated  
1079 shBRCA2 HCT116<sup>p21<sup>-/-</sup></sup> cells transfected with siROCK (1+2) or treated with Fasudil (N=2). **C)**  
1080 Representative PEO1 cells stained with DAPI, Cyclin A (S phase marker, red) and Phalloidin  
1081 (actin cytoskeleton, green) after Fasudil treatment (3 days, 128  $\mu$ M). **D)** Quantification of cyclin  
1082 A positive cells in each group: mononucleated; binucleated. The % of mononucleated or  
1083 binucleated /total cells is shown in the lower part of the panel. Statistical analysis was performed  
1084 using a two-way ANOVA followed by a Bonferroni post-test (\* $p < 0.05$ , \*\* $p < 0.01$ , \*\*\* $p < 0.001$ ).  
1085 Data in A, B and D are shown as the average of 2 independent experiments with the standard  
1086 error of the mean.

1087

1088 **Figure 7 - figure supplement 1. Mitosis as an alternative synthetic lethality strategy for**  
1089 **BRCA2 deficient cells. A)** Relative cell number (%) of shScramble and shBRCA2 HCT116<sup>p21<sup>-/-</sup></sup>  
1090 cells at 6 days after transfection with siCITK or siROCK (1+2) (N=2). Representative images are  
1091 shown on the right. **B)** Relative cell number (%) of shScramble and shBRCA2 HCT116<sup>p21<sup>-/-</sup></sup> cells

1092 at 6 days after transfection with siEMI1. Samples were treated with Fasudil when indicated  
1093 (N=2). Representative images are shown on the right. Statistical analysis was performed using  
1094 a two-way ANOVA followed by a Bonferroni post-test (\* $p < 0.05$ , \*\* $p < 0.01$ , \*\*\* $p < 0.001$ ). Data are  
1095 shown as the average of 2 independent experiments with the standard error of the mean  
1096

# Figure 1

bioRxiv preprint doi: <https://doi.org/10.1101/2022.06.24.497514>; this version posted June 28, 2022. The copyright holder for this preprint (which was not certified by peer review) is the author/funder, who has granted bioRxiv a license to display the preprint in perpetuity. It is made available under aCC-BY 4.0 International license.

**A**

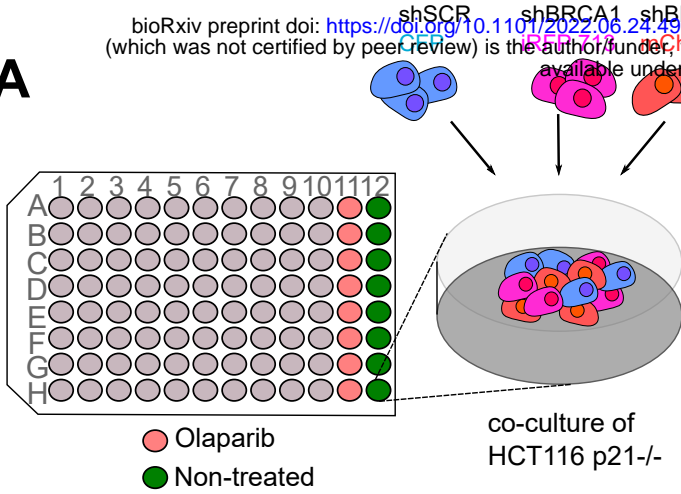

**B**

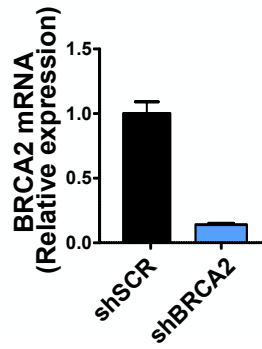

**C**

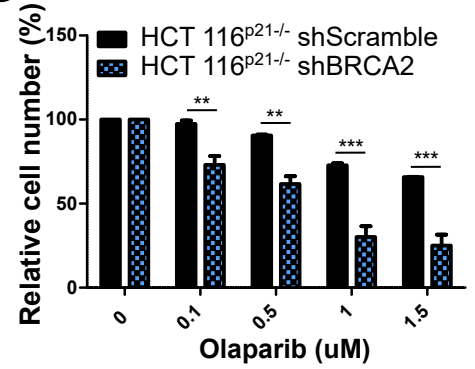

**D**

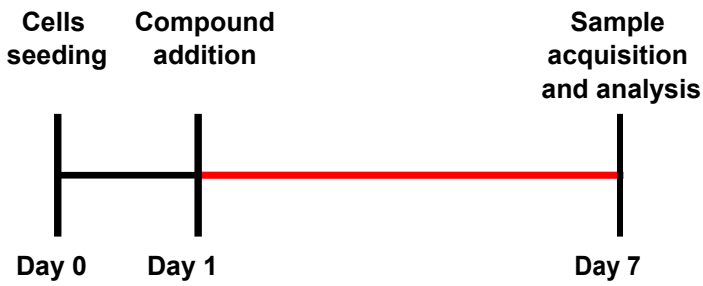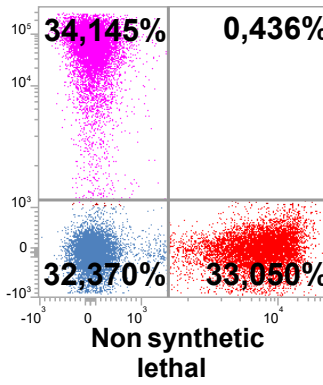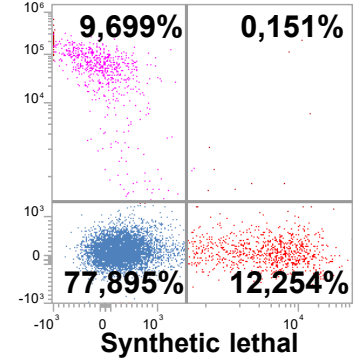

**E**

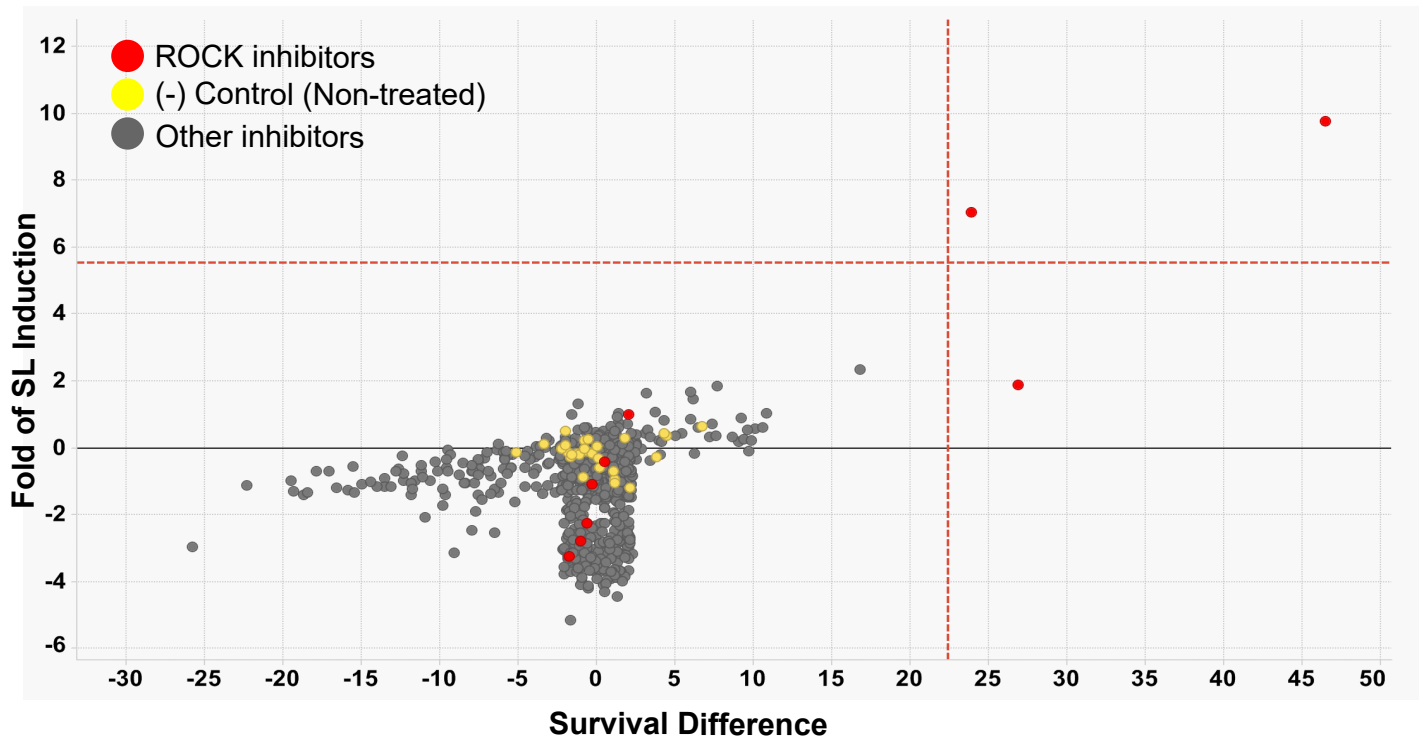

**F**

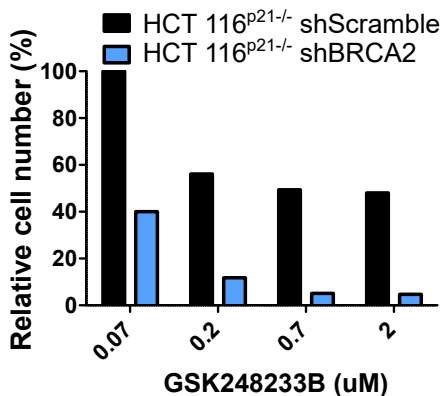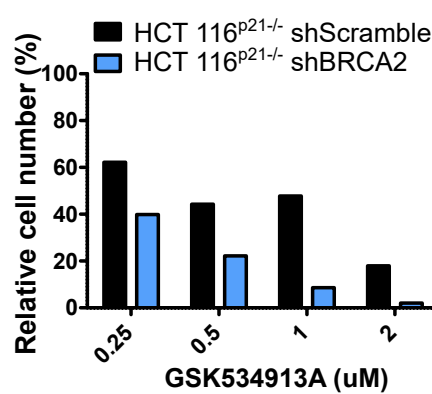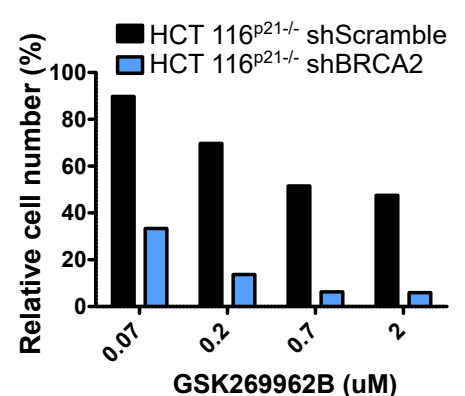

# Figure 2

bioRxiv preprint doi: <https://doi.org/10.1101/2022.06.24.497514>; this version posted June 28, 2022. The copyright holder for this preprint (which was not certified by peer review) is the author/funder, who has granted bioRxiv a license to display the preprint in perpetuity. It is made available under aCC-BY 4.0 International license.

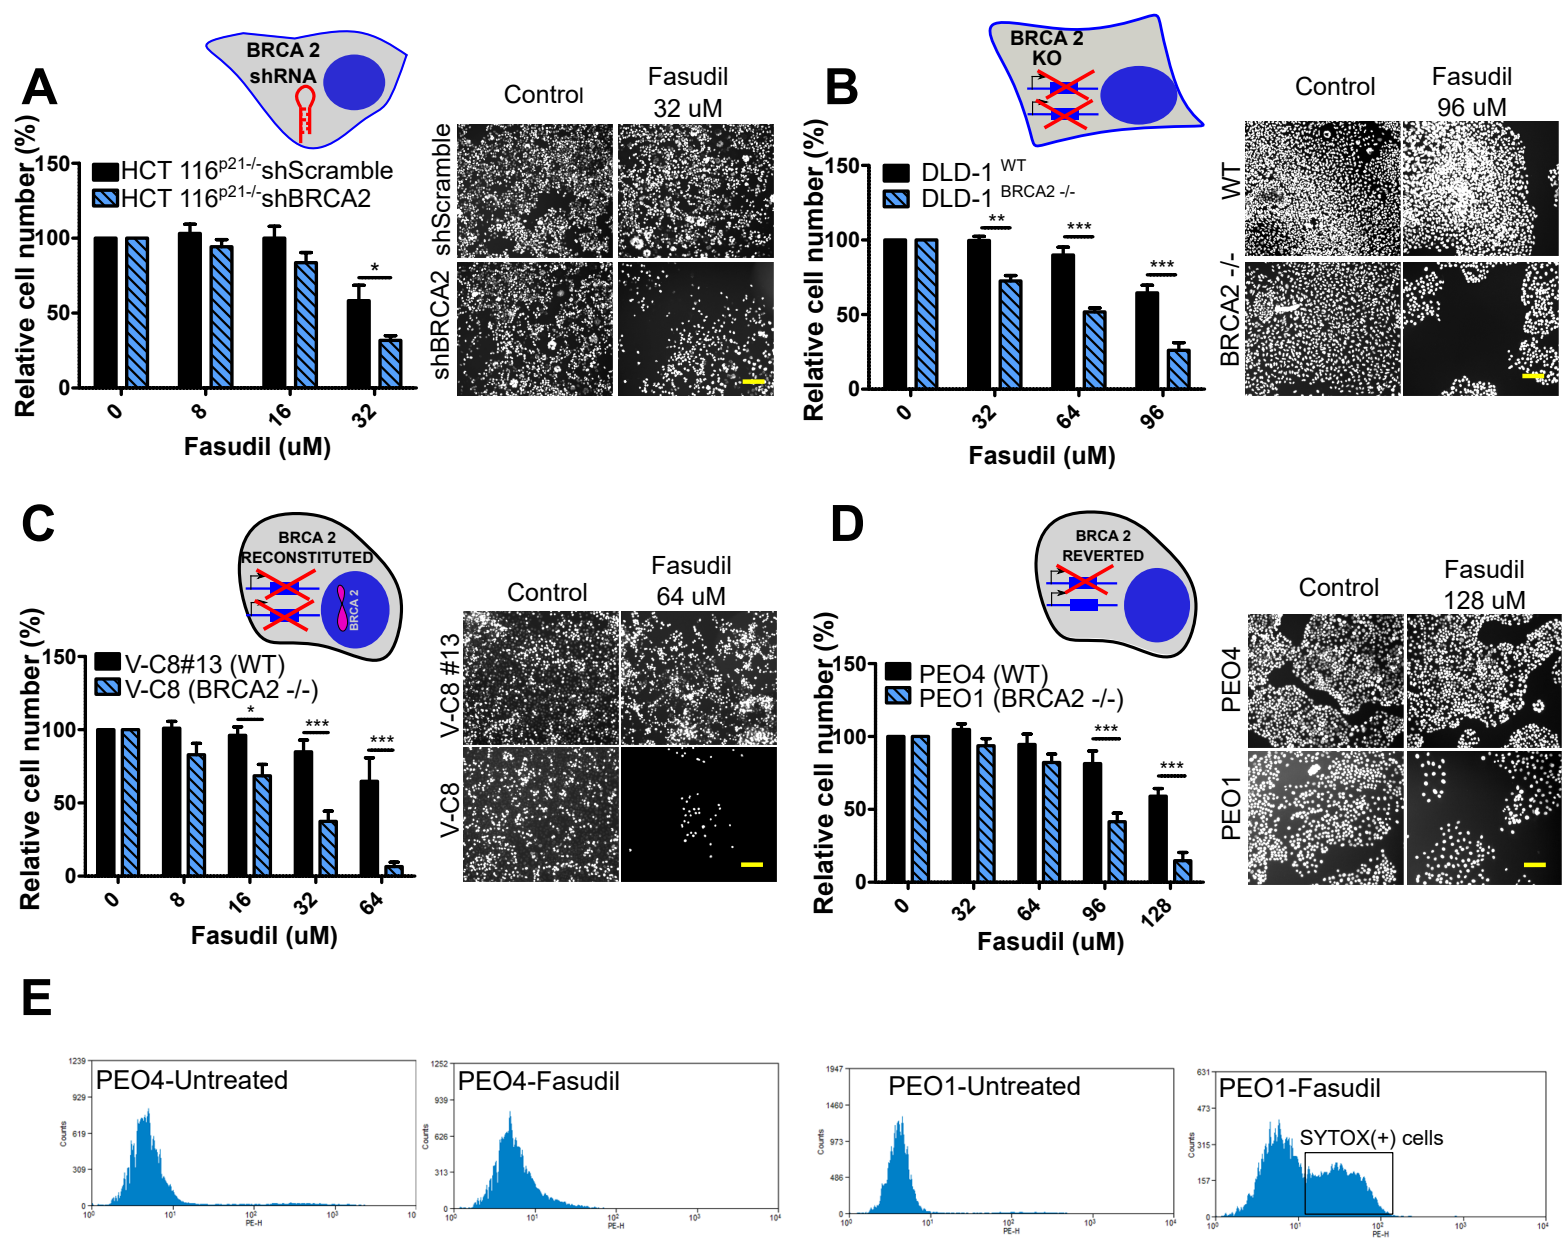

**Figure 2. BRCA2-deficient cells are selectively killed by the ROCK kinase inhibitor Fasudil.**

# Figure 3

bioRxiv preprint doi: <https://doi.org/10.1101/2022.06.24.497514>; this version posted June 28, 2022. The copyright holder for this preprint (which was not certified by peer review) is the author/funder, who has granted bioRxiv a license to display the preprint in perpetuity. It is made available under aCC-BY 4.0 International license.

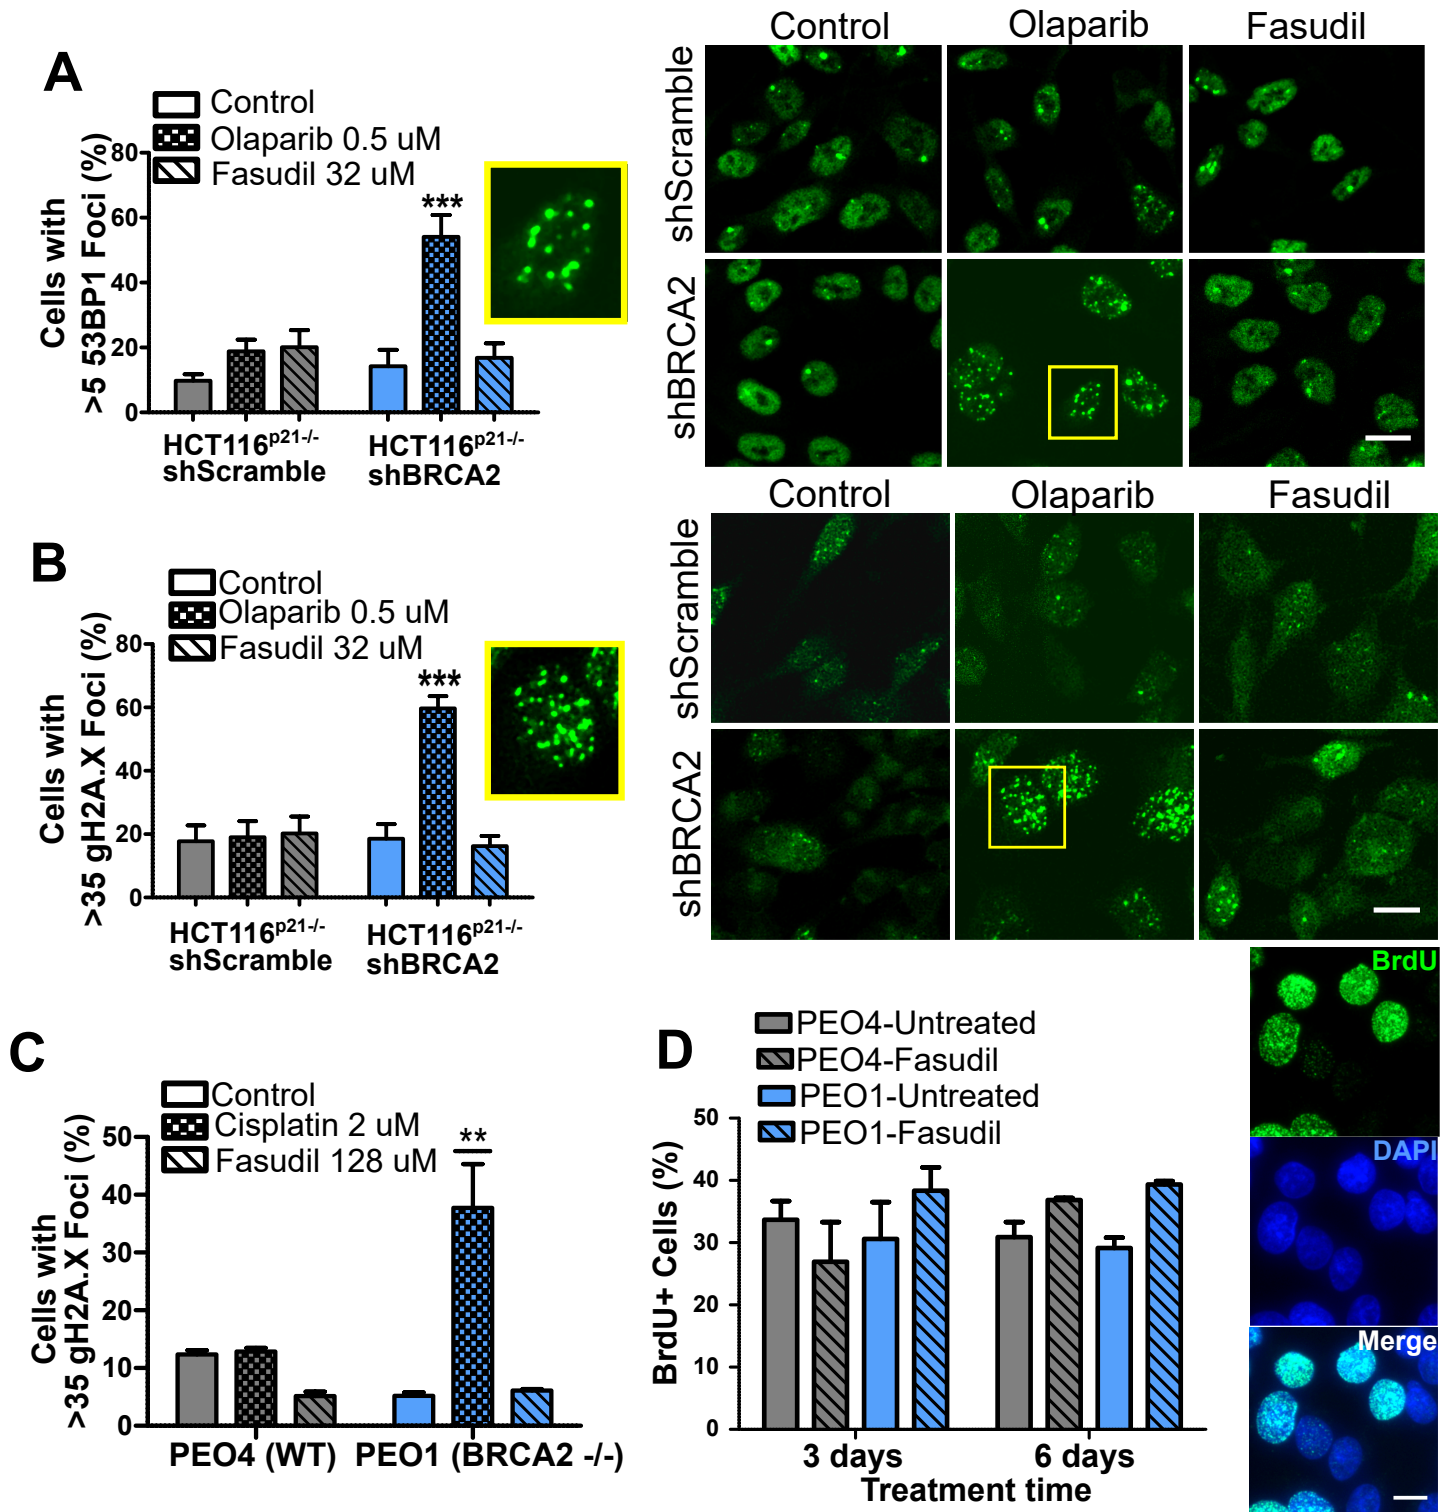

Figure 3. Fasudil does not induce acute replication stress in BRCA2-deficient cells

# Figure 4

bioRxiv preprint doi: <https://doi.org/10.1101/2022.06.24.497514>; this version posted June 28, 2022. The copyright holder for this preprint (which was not certified by peer review) is the author/funder, who has granted bioRxiv a license to display the preprint in perpetuity. It is made available under aCC-BY 4.0 International license.

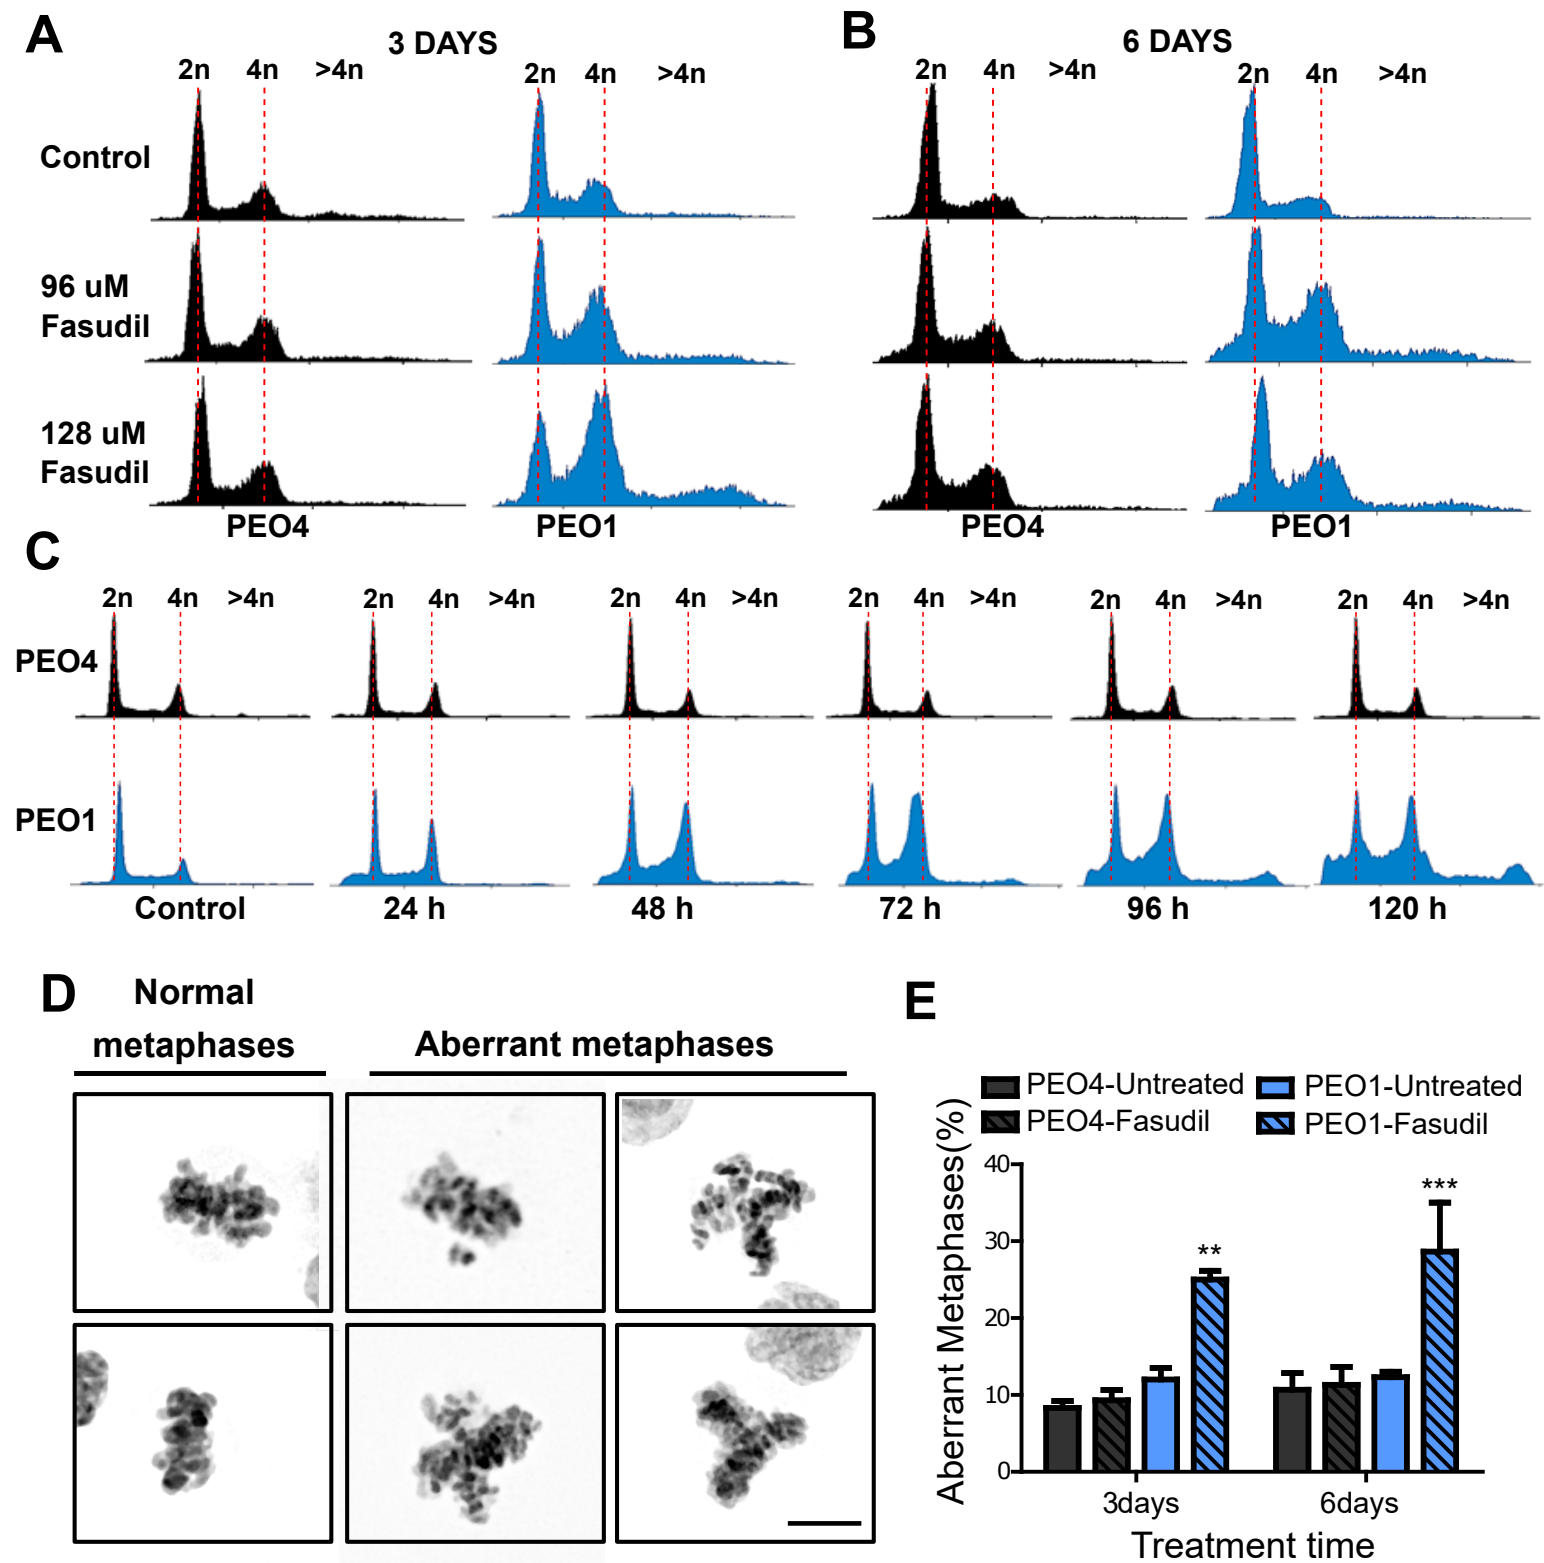

Figure 4. Fasudil treatment induces polyploidy and aberrant mitotic figures in BRCA2 deficient cells.

# Figure 5

## Normal anaphases

**A**

bioRxiv preprint doi: <https://doi.org/10.1101/2022.06.24.497514>; this version posted June 28, 2022. The copyright holder for this preprint (which was not certified by peer review) is the author/funder, who has granted bioRxiv a license to display the preprint in perpetuity. It is made available under aCC-BY 4.0 International license.

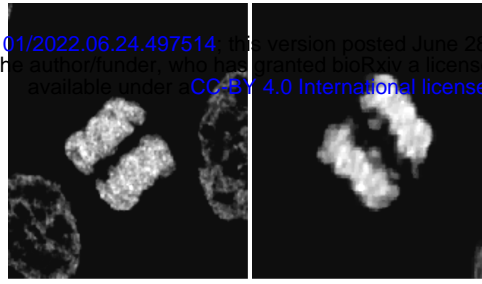

## Abnormal anaphases

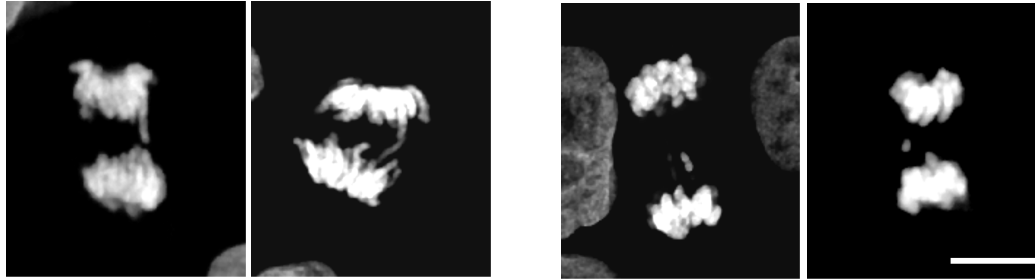

Chromosome bridge

Lagging chromosome

**B**

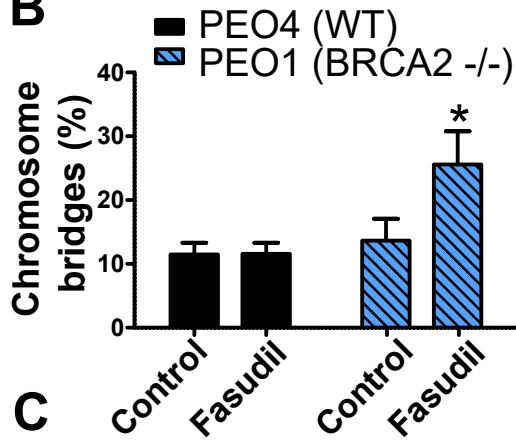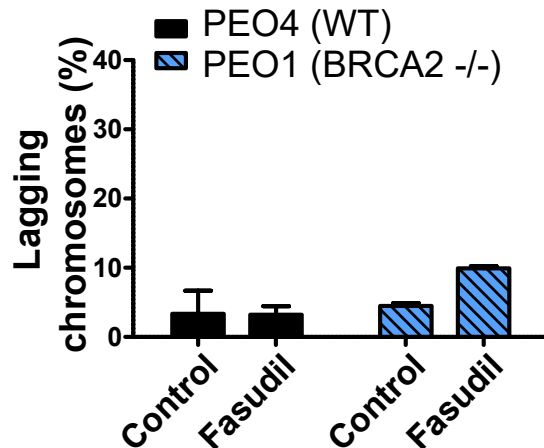

**C**

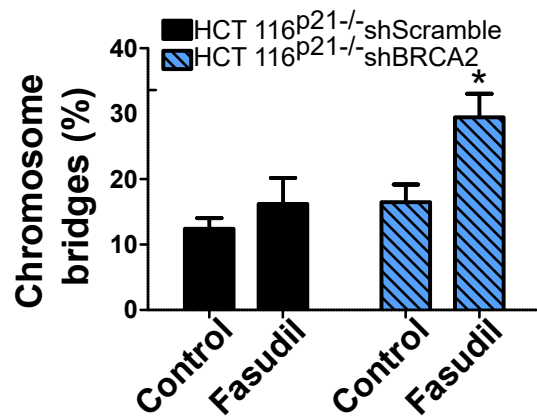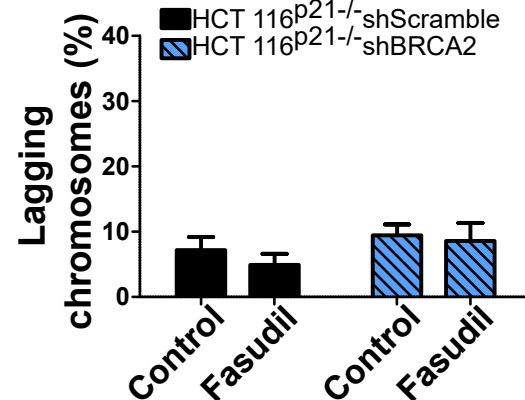

**D**

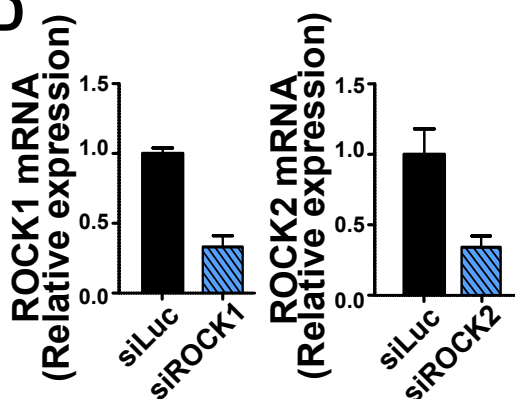

**E**

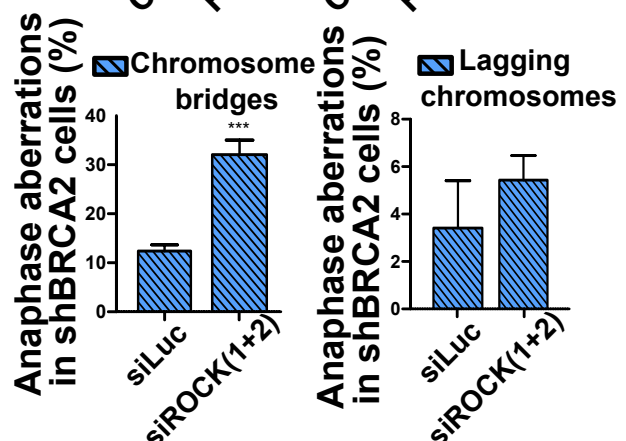

Figure 5. Mitotic DNA bridges accumulate in BRCA2-deficient cells following ROCK inhibition with Fasudil.

# Figure 6

bioRxiv preprint doi: <https://doi.org/10.1101/2022.06.24.497514>; this version posted June 28, 2022. The copyright holder for this preprint (which was not certified by peer review) is the author/funder, who has granted bioRxiv a license to display the preprint in perpetuity. It is made available under aCC-BY 4.0 International license.

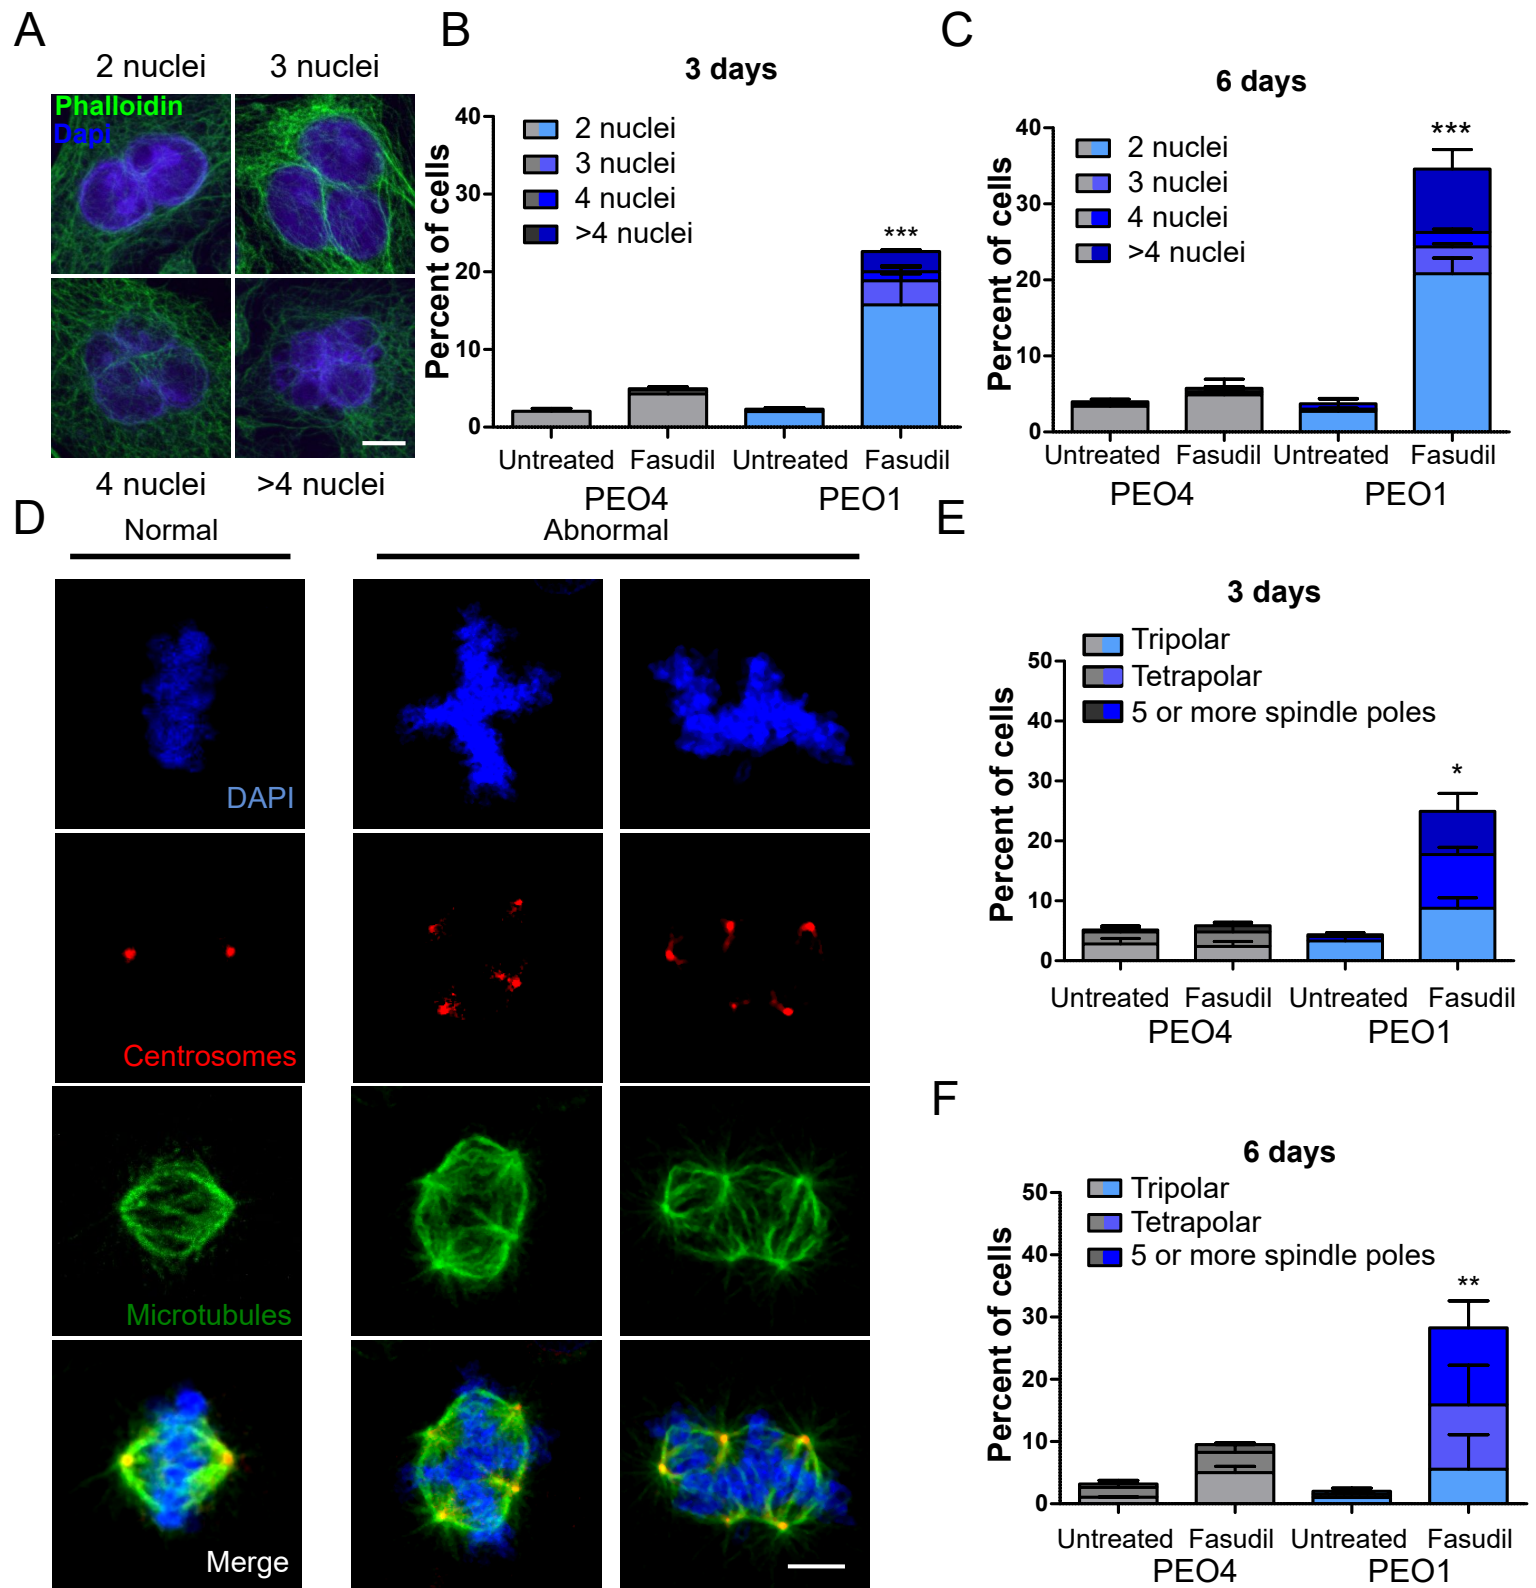

**Figure 6. BRCA2-deficient cells exhibit cytokinesis failure, centrosome amplification and multipolar mitotic spindles following Fasudil treatment.**



# Figure 7

bioRxiv preprint doi: <https://doi.org/10.1101/2022.06.24.497514>; this version posted June 28, 2022. The copyright holder for this preprint (which was not certified by peer review) is the author/funder, who has granted bioRxiv a license to display the preprint in perpetuity. It is made available under aCC-BY 4.0 International license.

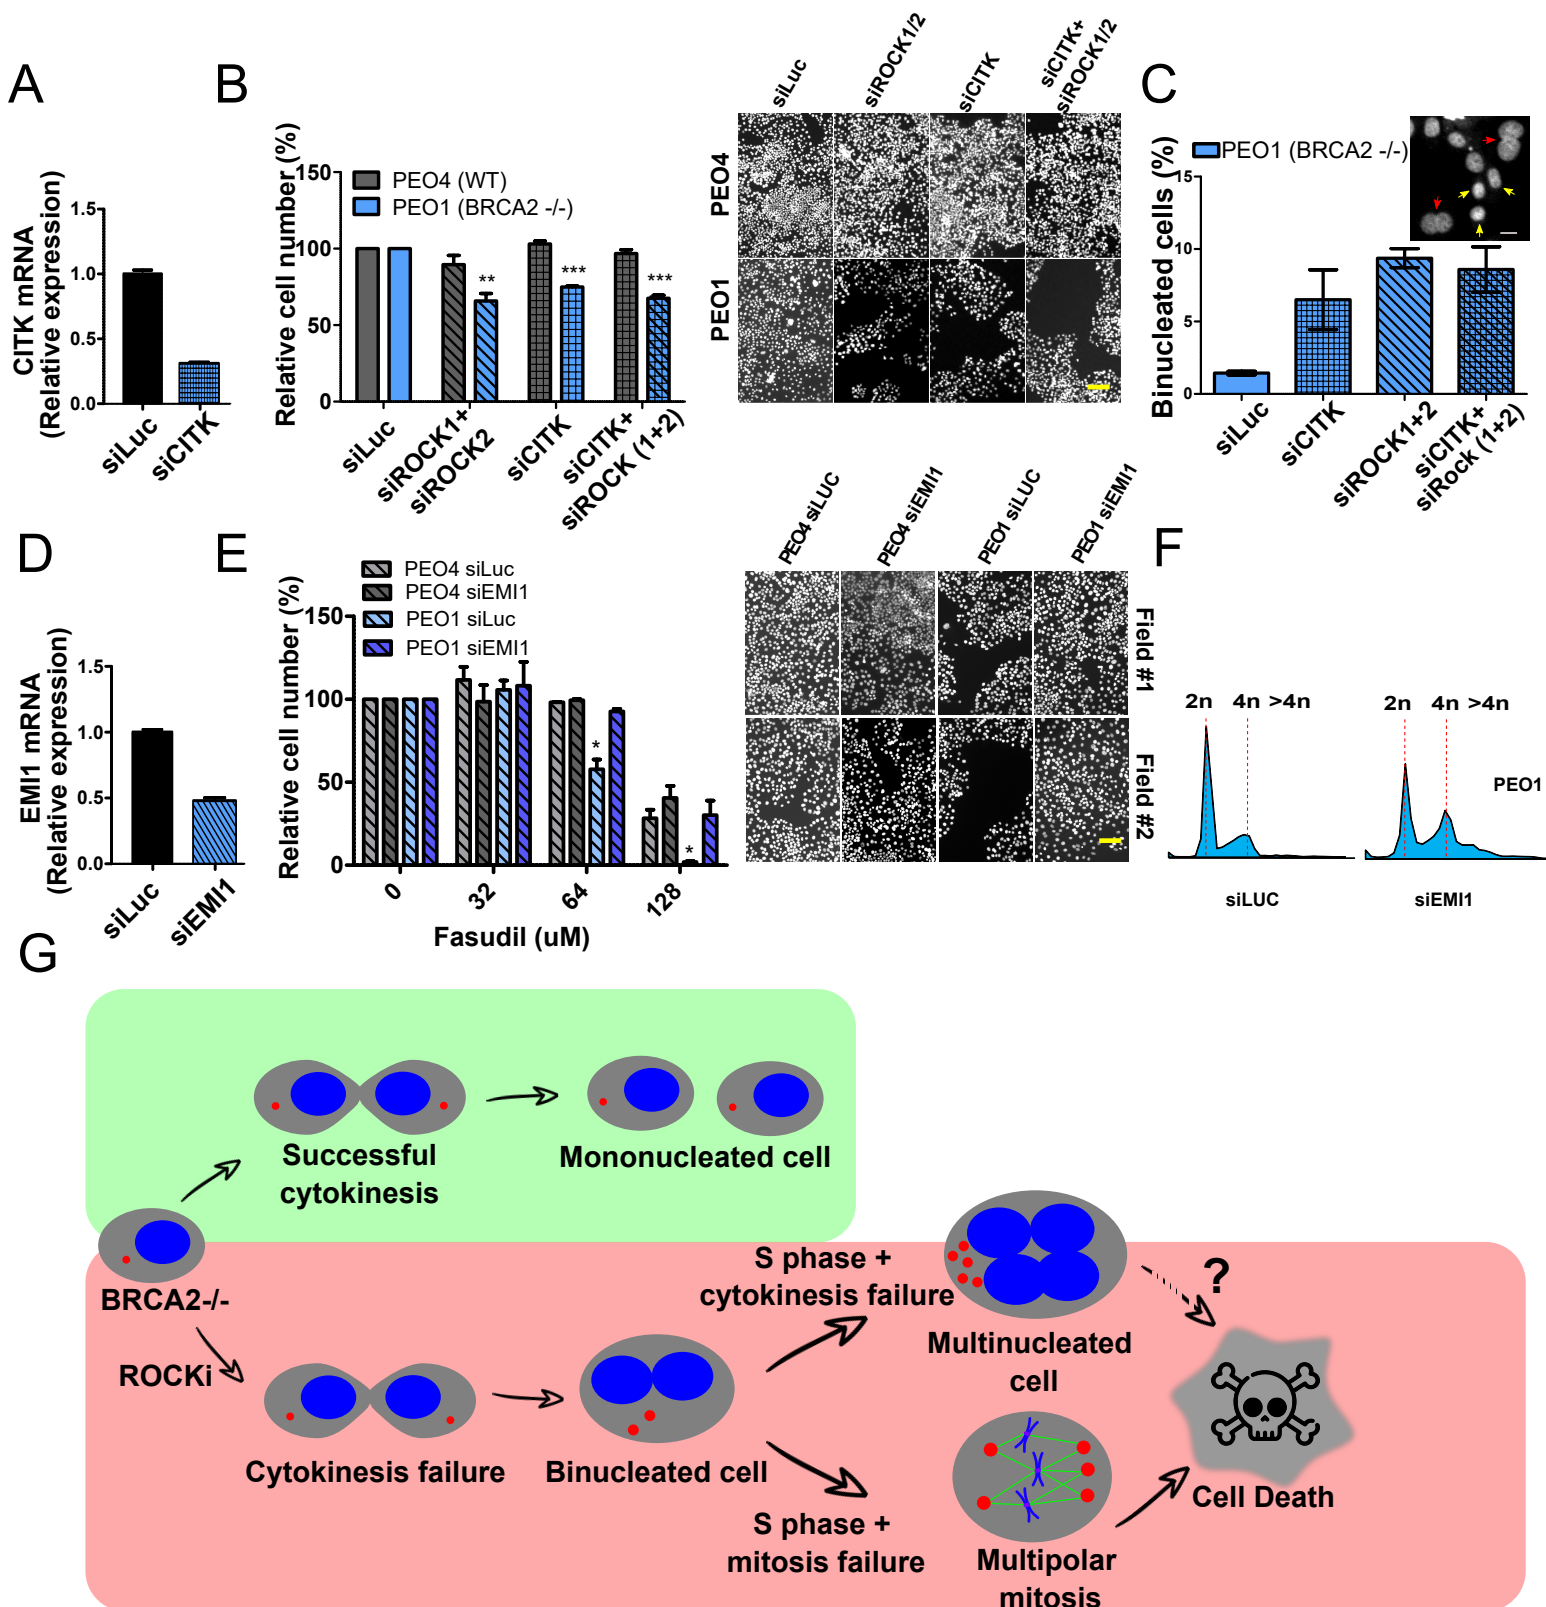

Figure 7. Mitosis as an alternative synthetic lethality strategy for BRCA2 deficient cells.

# Figure 1- figure supplement 1

bioRxiv preprint doi: <https://doi.org/10.1101/2022.06.24.497514>; this version posted June 28, 2022. The copyright holder for this preprint (which was not certified by peer review) is the author/funder, who has granted bioRxiv a license to display the preprint in perpetuity. It is made available under aCC-BY 4.0 International license.

**A**

| Inhibitor   | Survival Difference |
|-------------|---------------------|
| GSK180736A  | 0                   |
| GSK248233B  | 47.57               |
| GSK269962B  | 25.58               |
| GSK270822A  | 0                   |
| GSK429286A  | 0.29                |
| GSK466314A  | 0                   |
| GSK534911A  | 25.50               |
| GSK534913A  | 0                   |
| SB-772077-B | 0                   |

**B**

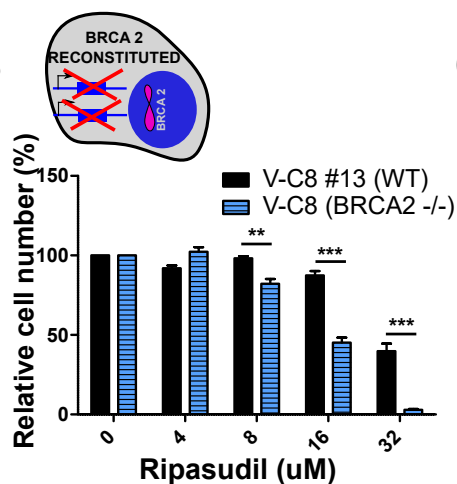

**C**

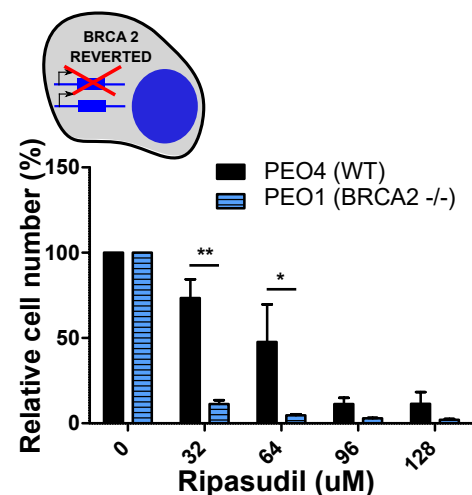

**D**

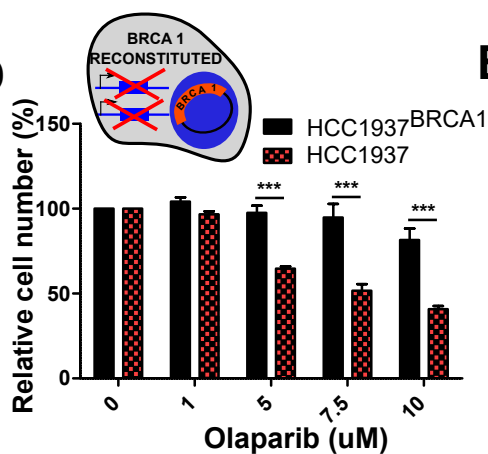

**E**

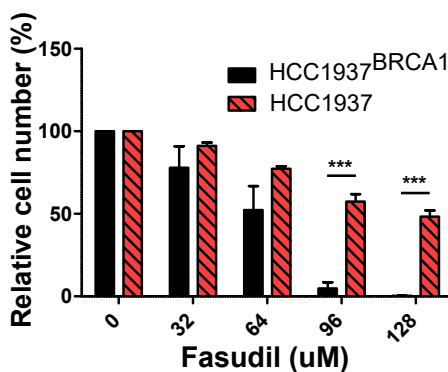

**F**

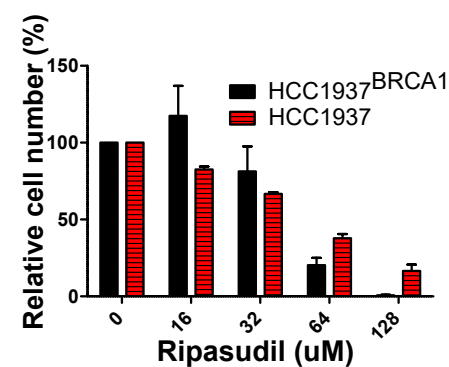

**G**

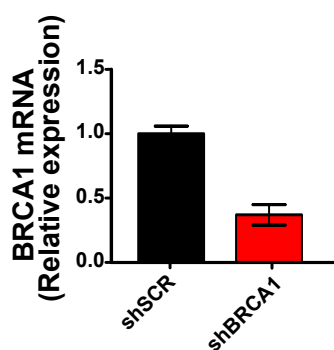

**H**

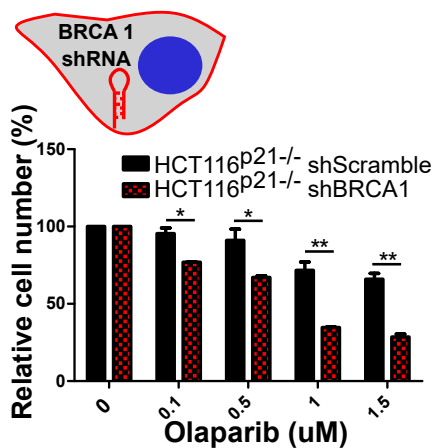

**I**

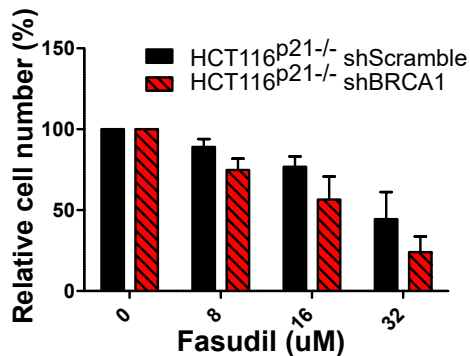

# Figure 2- figure supplement 1

bioRxiv preprint doi: <https://doi.org/10.1101/2022.06.24.497514>; this version posted June 28, 2022. The copyright holder for this preprint (which was not certified by peer review) is the author/funder, who has granted bioRxiv a license to display the preprint in perpetuity. It is made available under aCC-BY 4.0 International license.

**A**

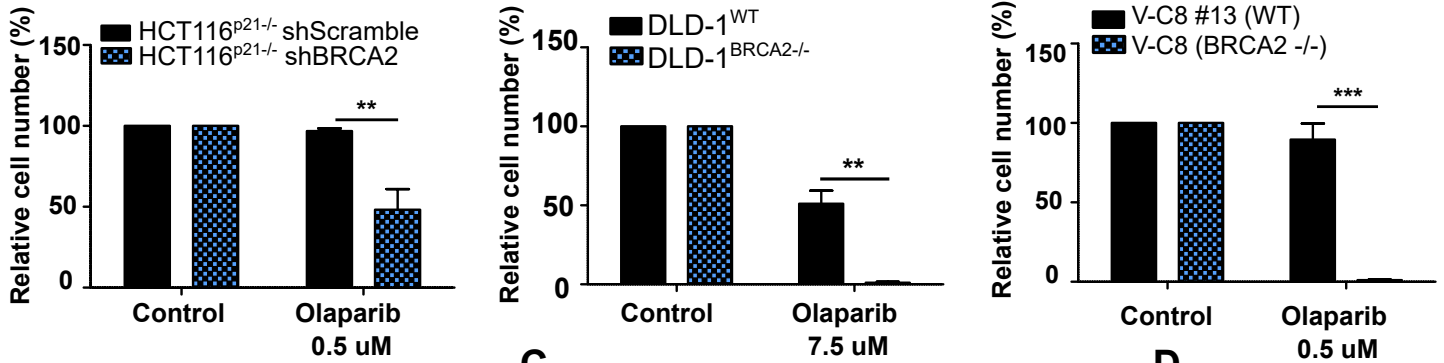

**B**

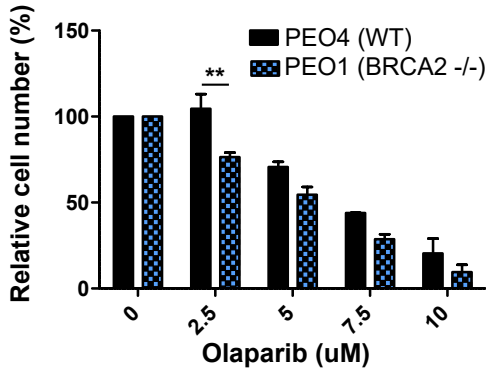

**E**

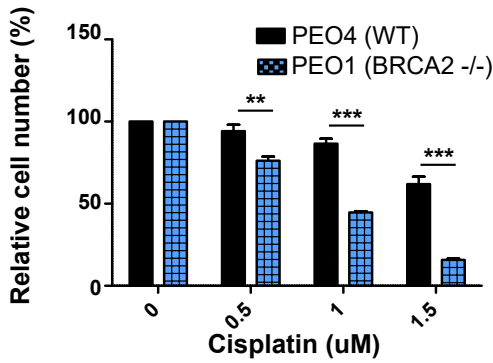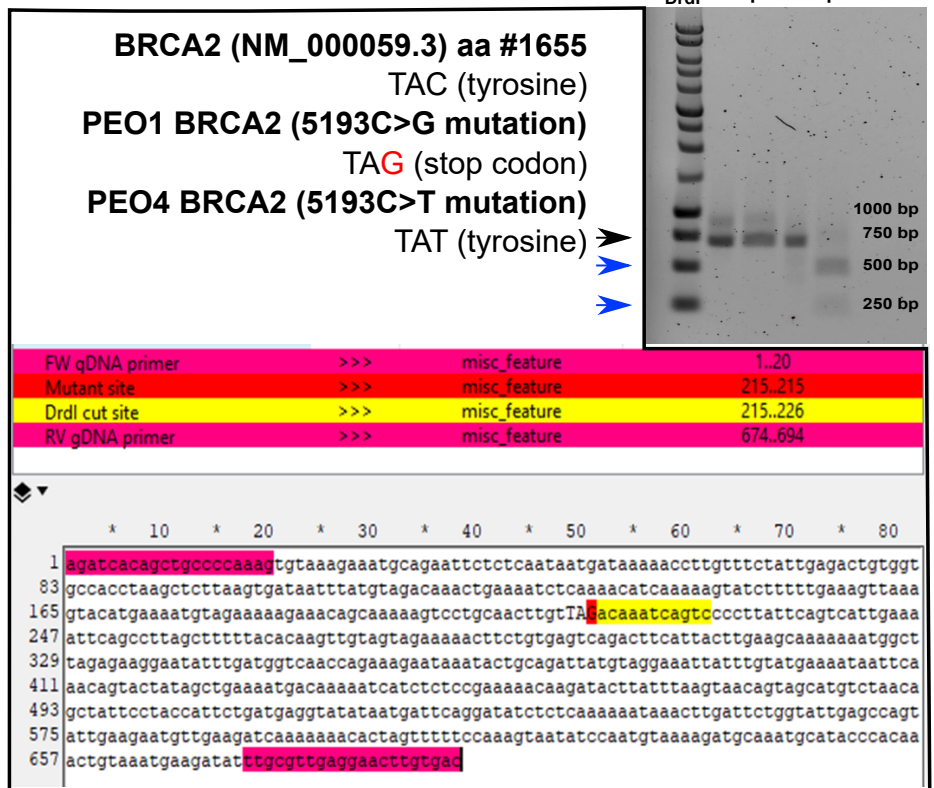

Figure 2- figure supplement 1. BRCA2-deficient cells are sensitive to Olaparib.

# Figure 3 - figure supplement 1

bioRxiv preprint doi: <https://doi.org/10.1101/2022.06.24.497514>; this version posted June 28, 2022. The copyright holder for this preprint (which was not certified by peer review) is the author/funder, who has granted bioRxiv a license to display the preprint in perpetuity. It is made available under a [CC-BY 4.0 International license](#).

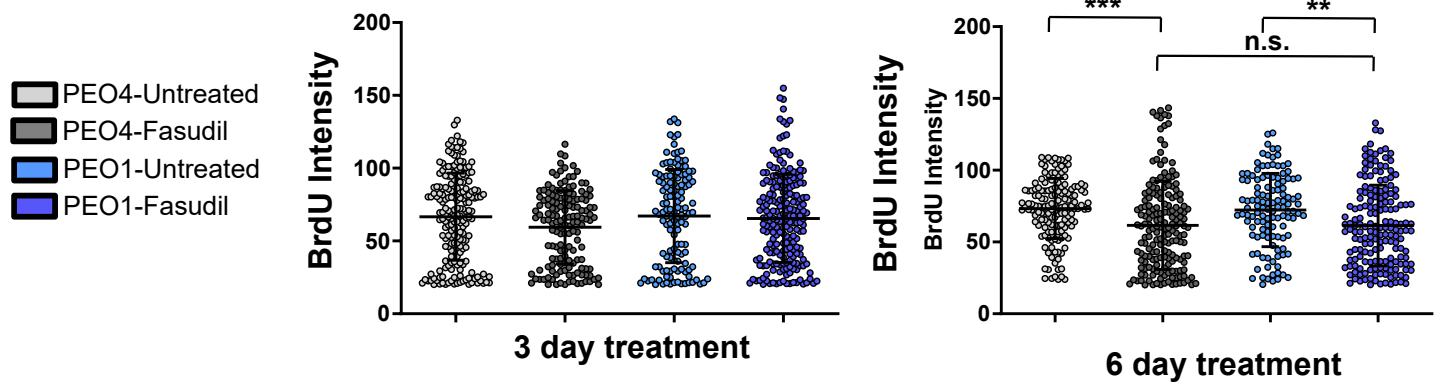

Figure 3 - figure supplement 1. Fasudil does not alter S phase in BRCA2-deficient cells

# Figure 3 - figure supplement 2

bioRxiv preprint doi: <https://doi.org/10.1101/2022.06.24.497514>; this version posted June 28, 2022. The copyright holder for this preprint (which was not certified by peer review) is the author/funder, who has granted bioRxiv a license to display the preprint in perpetuity. It is made available under aCC-BY 4.0 International license.

**A**

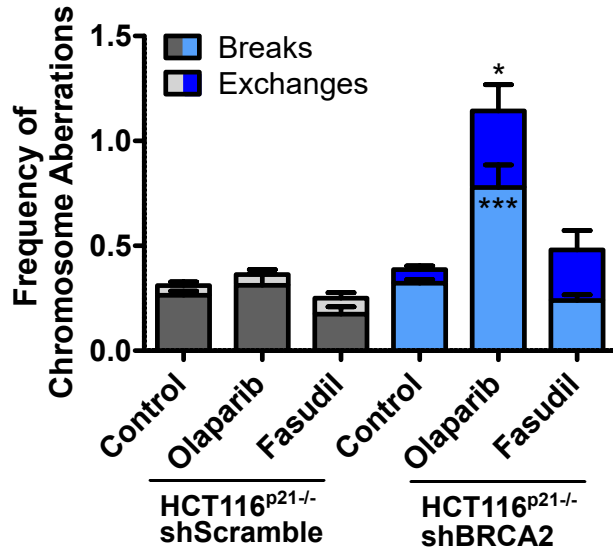

Breaks

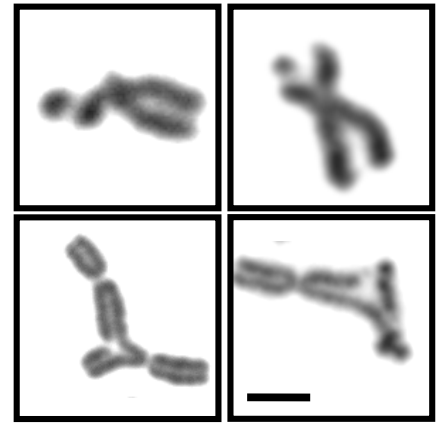

Exchanges

**B**

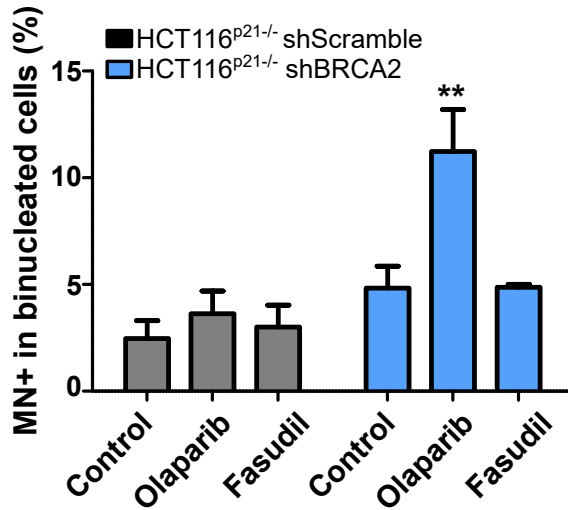

Binucleated cells  
with micronuclei

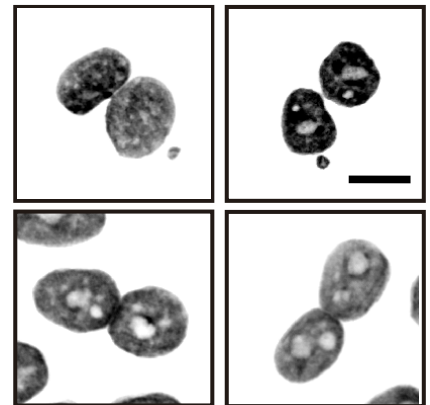

Binucleated cells  
without micronuclei

# Figure 6 - figure supplement 1

bioRxiv preprint doi: <https://doi.org/10.1101/2022.06.24.497514>; this version posted June 28, 2022. The copyright holder for this preprint (which was not certified by peer review) is the author/funder, who has granted bioRxiv a license to display the preprint in perpetuity. It is made available under aCC-BY 4.0 International license.

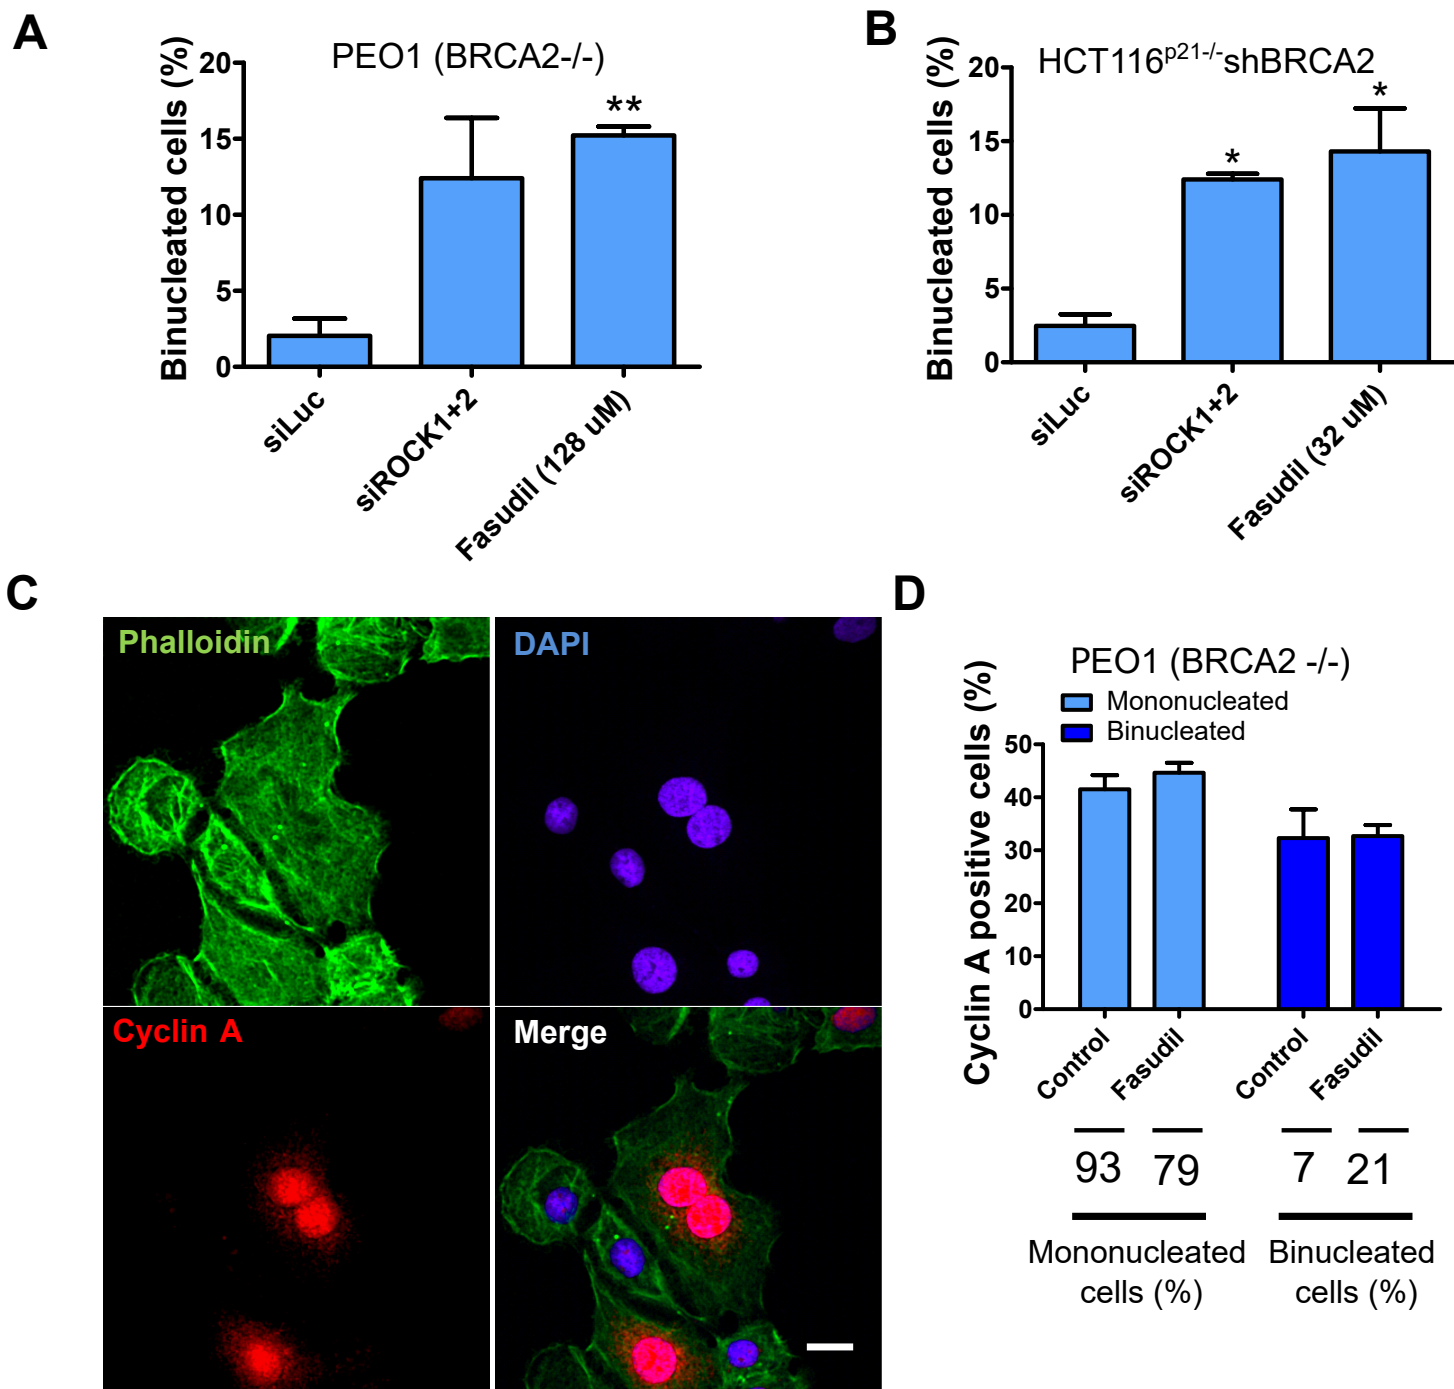

# Figure 7 - figure supplement 1

bioRxiv preprint doi: <https://doi.org/10.1101/2022.06.24.497514>; this version posted June 28, 2022. The copyright holder for this preprint (which was not certified by peer review) is the author/funder, who has granted bioRxiv a license to display the preprint in perpetuity. It is made available under aCC-BY 4.0 International license.

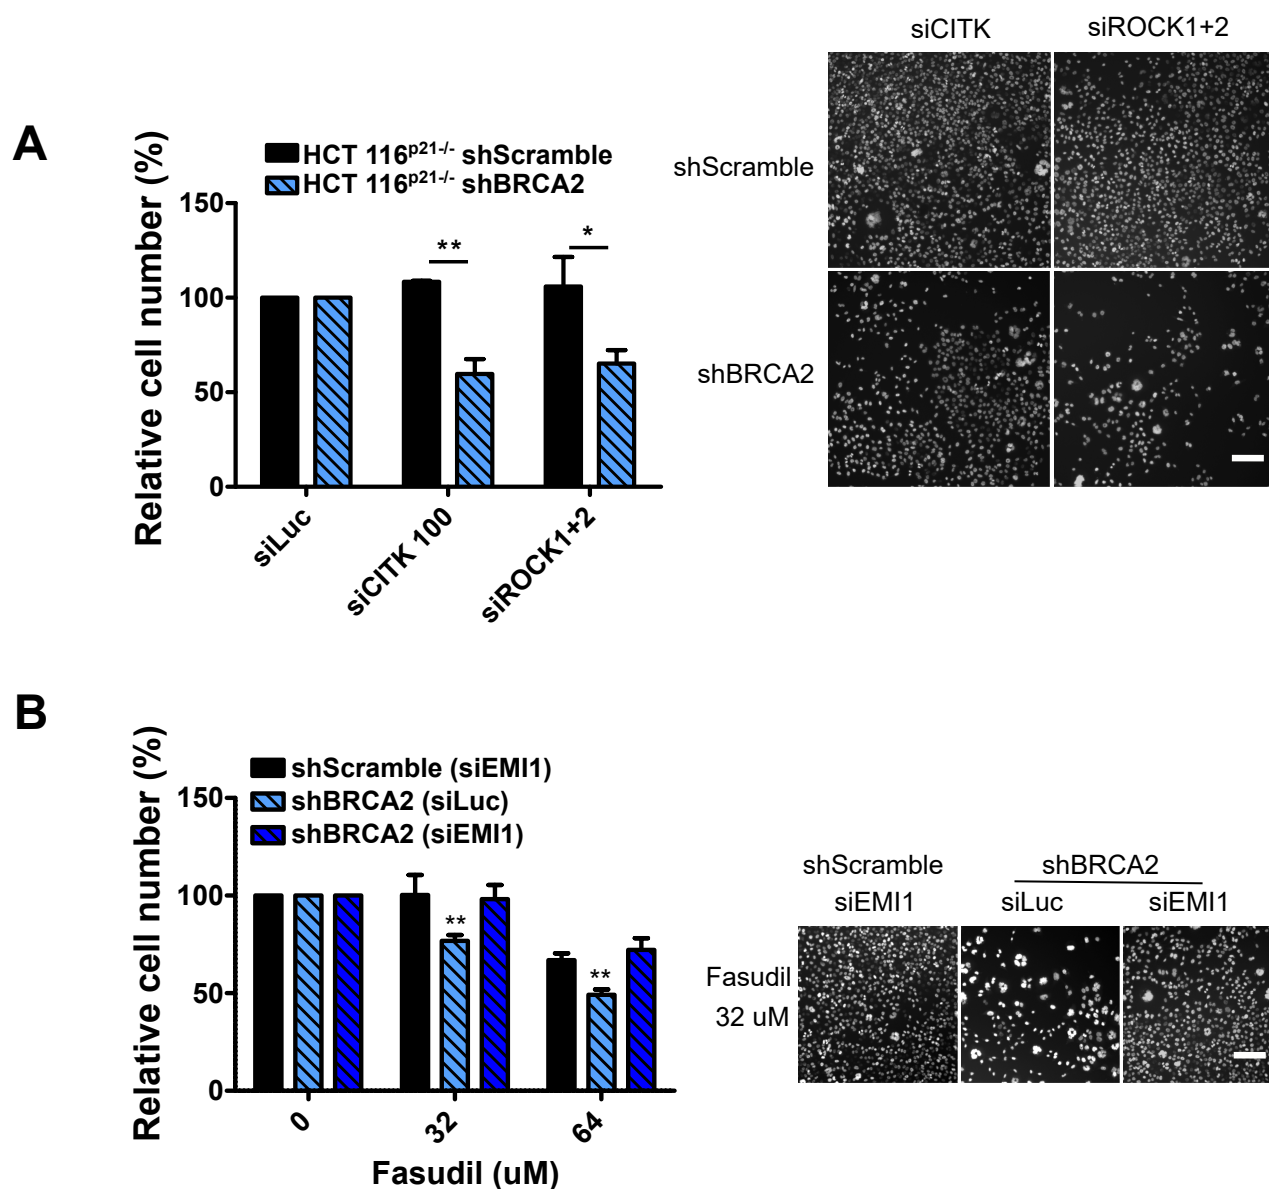

Figure 7 - figure supplement 1. Mitosis as an alternative synthetic lethality strategy for BRCA2 deficient cells
